1 **Functional and transcriptional profiling of non-coding RNAs in**  
2 **yeast reveal context-dependent phenotypes and widespread *in***  
3 ***trans* effects on the protein regulatory network**

4  
5 Laura Natalia Balarezo-Cisneros<sup>1,2</sup>, Steven Parker<sup>1,2</sup>, Marcin G Fraczek<sup>1,2</sup>, Soukaina  
6 Timouma<sup>1,2</sup>, Ping Wang<sup>2</sup>, Raymond T O'Keefe<sup>2</sup>, Catherine B Millar<sup>2\*</sup>, Daniela Delneri<sup>1,2\*</sup>

7  
8  
9 <sup>1</sup>Manchester Institute of Biotechnology, Faculty of Biology Medicine and Health, The  
10 University of Manchester, 131 Princess street, M1 7DN, UK

11  
12 <sup>2</sup>Division of Evolution and Genomic Sciences, Faculty of Biology, Medicine and Health, The  
13 University of Manchester, Oxford Road, Manchester M13 9PL, UK

14  
15  
16  
17 \*Correspondence should be addressed to DD ([d.delneri@manchester.ac.uk](mailto:d.delneri@manchester.ac.uk)) or CM  
18 ([catherine.millar@manchester.ac.uk](mailto:catherine.millar@manchester.ac.uk)).

19  
20  
21 Key words: non-coding RNA, transcriptome, yeast, transcription factors, *trans* effect, genetic  
22 interactions

## 23 **Abstract**

24 Non-coding RNAs (ncRNAs), including the more recently identified Stable Unannotated  
25 Transcripts (SUTs) and Cryptic Unstable Transcripts (CUTs), are increasingly being shown to  
26 play pivotal roles in the transcriptional and post-transcriptional regulation of genes in  
27 eukaryotes. Here, we carried out a large-scale screening of ncRNAs in *Saccharomyces*  
28 *cerevisiae*, and provide evidence for SUT and CUT function. Phenotypic data on 372 ncRNA  
29 deletion strains in 23 different growth conditions were collected, identifying ncRNAs  
30 responsible for significant cellular fitness changes. Transcriptome profiles were assembled for  
31 18 haploid ncRNA deletion mutants and 2 essential ncRNA heterozygous deletants. Guided  
32 by the resulting RNA-seq data we analysed the genome-wide dysregulation of protein coding  
33 genes and non-coding transcripts. Novel functional ncRNAs, SUT125, SUT126, SUT035 and  
34 SUT532 that act *in trans* by modulating transcription factors were identified. Furthermore, we  
35 described the impact of SUTs and CUTs in modulating coding gene expression in response  
36 of different environmental conditions, regulating important biological process such as  
37 respiration (SUT125, SUT126, SUT035, SUT432), steroid biosynthesis (CUT494, SUT530,  
38 SUT468) or rRNA processing (SUT075 and snR30). Overall, this data captures and integrates  
39 the regulatory and phenotypic network of ncRNAs and protein coding genes, providing  
40 genome-wide evidence of the impact of ncRNAs on cellular homeostasis.

41

## 42 **Author Summary**

43

44 The yeast genome contains 25% of non-coding RNA molecules (ncRNAs), which do not  
45 translate into proteins but are involved in regulation of gene expression. ncRNAs can affect  
46 nearby genes by physically interfering with their transcription (*cis* mode of action), or they  
47 interact with DNA, proteins or others RNAs to regulate the expression of distant genes (*trans*  
48 mode of action). Examples of *cis*-acting ncRNAs have been broadly described, however  
49 genome-wide studies to identify functional *trans*-acting ncRNAs involved in global gene

50 regulation are still lacking. Here, we used the ncRNA yeast deletion collection to score their  
51 impact on cellular function in different environmental conditions. A group of 20 ncRNAs  
52 mutants with broad fitness diversity were selected to investigate their effect on the protein and  
53 ncRNA expression network. We showed a high correlation between altered phenotypes and  
54 global transcriptional changes, in an environmental dependent manner. We confirmed the  
55 widespread *trans* acting expressional regulation of ncRNAs in the genome and their role in  
56 affecting transcription factors. These findings support the notion of the involvement on ncRNAs  
57 in fine tuning the cellular expression via regulations of TFs, as an advantageous RNA-  
58 mediated mechanism that can be fast and cost-effective for the cells.

## 59 Introduction

60 Gene regulation is a key biological process across all life forms, and multiple gene  
61 interactions quickly allow adaptation to different conditions in response to environmental  
62 stimuli. This response may induce adaptation to various food sources, trigger alternative  
63 metabolic pathways, or overcome stress factors.

64 Chromatin modifications and DNA methylation are two main mechanisms of regulating gene  
65 expression. More recently, RNA transcripts which are not translated into protein, have been  
66 described to have a prominent role as epigenetic modifiers [1,2]. There are an increasing  
67 number of examples of these non-coding RNA (ncRNA) transcripts regulating gene  
68 expression positively and negatively [3-10].

69 RNA interference (RNAi) was the first understood example of ncRNA involvement in  
70 epigenetics [11]. This RNAi mechanism involves ncRNAs binding to target mRNA sequences,  
71 inhibiting their translation [12]. *Saccharomyces cerevisiae* (*S. cerevisiae*) lacks RNAi  
72 machinery; however, a large number of non-coding transcripts have been identified in this  
73 budding yeast using high-throughput and high-resolution technologies. These ncRNA  
74 transcripts come from what is known as “pervasive transcription”, a mechanism that generates  
75 RNAs distinct from those that encode proteins or those with established functions (e.g.  
76 snoRNAs, snRNAs, rRNAs) [13]. Among a list of catheterized pervasive transcripts, Stable

77 Unannotated Transcripts (SUTs) and Cryptic Unstable Transcripts (CUTs) show an essential  
78 role in gene regulation, influencing histone modifications or regulating transcription of nearby  
79 genes [4,5,14–16].

80 SUTs and CUTs are polyadenylated RNAs transcribed by RNA polymerase II [17] and  
81 are distributed across the entire *S. cerevisiae* genome. Classically, SUTs and CUTs arise from  
82 nucleosome-depleted regions (NDRs) associated with bidirectional promoters of protein-  
83 coding genes [17,18], but differ in their association with the RNA decay machinery. CUTs are  
84 capped and degraded rapidly by the nuclear exosome and the TRAMP (Trf4-Air1/Air2-Mtr4)  
85 complex [19], whereas SUTs are only partially susceptible to Rrp6p activity [17] and are mainly  
86 affected by cytoplasmic RNA decay pathways including the translation-dependent nonsense-  
87 mediated decay (NMD) pathway and Xrn1- dependent 5' to 3' degradation [20]. As a result,  
88 SUTs persist longer than CUTs.

89 Gene regulation activities have been ascribed to SUTs and CUTs. In many cases,  
90 ncRNAs appear to cause transcriptional interference [3,5,15,16,21-23] affecting the  
91 expression of neighbouring genes in *cis*. On the other hand, ncRNAs can be functional and  
92 regulate in *trans* the expression of genes located both nearby or at distant loci [4,6,10].  
93 Although only a small number of functional ncRNAs have been well characterized to date,  
94 they have been shown to control gene expression at the transcriptional level. For instance,  
95 SUT075 has recently been reported to regulate the expression of *PRP3* when overexpressed  
96 remotely on a plasmid [10]. Another example is SUT457, which is involved in telomere  
97 organization. SUT457 regulates the levels of telomeric ssDNA in a Exo1-dependent manner  
98 [9]. Interestingly, CUT281, known as *PHO84* ncRNA because it overlaps the protein-coding  
99 *PHO84* gene, triggers *PHO84* silencing in a *trans* and *cis* manner using two independent  
100 mechanisms. While the *cis*-acting mechanism requires Hda1/2/3 deacetylation machinery,  
101 *trans* function is generated by the Set1 histone methyltransferase [5,6].

102 Emerging evidence has suggested ncRNAs roles in the recruitment of transcription  
103 factors (TFs) to their binding sites in fission yeast, mouse and humans [21-26], thus,

104 suggesting a conserved mechanism of gene expression among eukaryotes. On one hand,  
105 ncRNA expression around regulatory elements can locally promote TF binding [23-24]. On the  
106 other hand, ncRNA can regulate gene expression by acting as binding competitors for DNA-  
107 binding proteins (DBPs) [25-26].

108         Considerable progress has been made over the past decade to elucidate the unique  
109 features and molecular mechanisms of ncRNA. However, detailed insights have been limited  
110 to single ncRNA genes, usually affecting neighbouring genes. Here, we combine large-scale  
111 phenotypic analysis with RNA-seq technology to generate a global view of the transcriptome  
112 following ncRNA deletion. Specifically, by analysing the expression network, we show that the  
113 global transcriptional effect of deleting four SUTs is indirect and acts via specific TFs whose  
114 level of expression is affected by deleting these ncRNAs. This *trans* effect supports and  
115 extends previous premises that SUTs or CUTs are a functional part of the genome and can  
116 influence the general transcriptional output of a cell independent from where they are located.

117

## 118 **Results and Discussion**

### 119 **Fitness profiling of haploid ncRNA deletion strains reveals plasticity of** 120 **phenotype in different environmental conditions**

121         To investigate the plasticity of ncRNA deletion mutations on organism fitness, we  
122 acquired phenotypic data for the haploid ncRNA deletion collection generated by Parker *et al.*  
123 (2017) in 23 different conditions. The ability of 50 CUT, 93 SUT, 61 snoRNA and 168 tRNA  
124 deletion mutant strains to utilize different carbon sources, and to tolerate extreme pH and  
125 oxidative stress was scored. The colony size was used as a proxy for fitness and normalized  
126 to the wild-type strain according to Tong and Boone [9]. The ncRNA deletion mutants showing  
127 similar behaviour across the 23 different conditions were grouped, generating 42 distinct  
128 functional clusters (Fig 1). The list of deletion mutant strains in each cluster is reported in the  
129 Supplementary Dataset S1.

130 About 45% of the ncRNA deletion mutants analysed did not show significant phenotypic  
131 changes in any condition tested, while about 24% of the ncRNA deletion strains showed  
132 significant changes in fitness in at least one condition tested. The remaining ncRNA deletion  
133 mutants (*i.e.* clusters 1 to 5) displayed a severe fitness defect in the majority of conditions, in  
134 particular when grown in ethanol, glycerol, sorbitol or melezitose as carbon sources. These  
135 clusters contained mostly tRNAs and SUTs rather than CUTs and snoRNAs (Supplementary  
136 Dataset S1). The conditions that affected the least number of ncRNA deletion mutants were  
137 YP+ 2% Fructose, YPD+ 5% Methanol, and YPD+ 5% Isopropanol, which affected 4.3%, 4.5%  
138 and 5.1% of ncRNA deletion mutants, respectively. Conditions that induced the broadest  
139 fitness changes were YP+ 7% Ethanol and YP+ 2% Glycerol, with 11.8% and 11.5% of ncRNA  
140 deletion mutants affected, respectively (Fig 1 and Supplementary Dataset S1).

141 Liquid growth assays were also set up for SUT and CUT deletion mutants that displayed either  
142 severe fitness defects (clusters 1, 2 and 5), fitness gain (clusters 7 to 9), or no phenotype  
143 (cluster 10). The overall liquid growth phenotype is reported as relative area under the growth  
144 curve (Fig 2), and the breakdown for the different growth phases is available in Table S1.  
145 Overall, in rich media, the majority of deletion mutant strains showed no growth difference,  
146 with the exception of the reduced fitness of *SUT125Δ*, *SUT126Δ* and  
147 *CUT494/SUT053/SUT468Δ* and the improved fitness of *CUT248Δ* (S1 Table).

148 When 10% ethanol was added to the media, *SUT125Δ*, *SUT126Δ*, *SUT035Δ*, *SUT532Δ*,  
149 *SUT129Δ* and *CUT494/SUT053/SUT468Δ* displayed severe fitness defects affecting the  
150 majority of the growth phases (Fig 2A and S1 Table); a similar profile for fitness impairment  
151 for *SUT125*, *SUT126* and *SUT035* was observed in media containing either 5% ethanol (Fig  
152 2B) or 2% glycerol (Fig 2C). However, *SUT532Δ* and *SUT129Δ* had a divergent fitness profile  
153 in 5% ethanol and 2% glycerol. *SUT532Δ* presented a significant fitness defect in YP+ 5%  
154 Ethanol and a growth improvement in YP+ 2% Glycerol (Fig 2B and C), whereas *SUT129Δ*  
155 showed an improvement in YP+5% Ethanol and defect in 2% glycerol.

156 Several SUTs and CUTs displayed improved fitness in the YP+ 5% Ethanol liquid media (Fig  
157 2B) revealing a similar phenotypic change in both solid and in liquid media. About 56% of the

158 strains grown in YPD+10% Ethanol and 27.7% of the strains grown in YP+ 2% Glycerol  
159 displayed some differences in fitness profiles between solid and liquid media. For example,  
160 *CUT494/SUT053/SUT468Δ*, *SUT129Δ*, *SUT329Δ* and *CUT442Δ* exhibited fitness impairment  
161 in YP+ 2% Glycerol which was not previously detected in the solid fitness assay.  
162 Discrepancies between solid and liquid fitness are likely due to the differing oxygen availability  
163 and diffusion rates of one or more nutrients on solid media [27-31]. Indeed, when growing on  
164 solid surfaces, colony morphology differs between yeast growth phases and time [32–34].  
165 Therefore, these results re-iterate the importance of acquiring data from both solid and liquid  
166 growth assays for an accurate picture of cellular fitness.

## 167 **ncRNA deletions drive global transcriptional changes that correlate with** 168 **phenotypic profiles**

169 The main function previously ascribed to ncRNAs in budding yeast is transcriptional  
170 regulation, usually of neighbouring or overlapping single genes [3, 4, 7, 16, 35, 36] We  
171 therefore investigated by RNA-seq whether selected ncRNA deletion mutants with altered  
172 phenotypes also have dysregulated transcriptomes. We selected 18 haploid ncRNA deletion  
173 mutants from clusters 1, 2, 5 and 7-10 with different types of phenotypic changes (*i.e.* growth  
174 defects, improvements and no changes) to study by RNA-seq, together with heterozygous  
175 deletions of 2 essential ncRNAs, namely *SUT075* and *snR30* (previously described in Parker  
176 et al [10]) (Table 1). As expected, we detected changes in the levels of at least one  
177 neighbouring transcript in 8 of the ncRNA deletion mutant strains analysed by RNA-seq. Three  
178 of these deletion mutants (*SUT099Δ*, *SUT722Δ*, *SUT171Δ*) up-regulate only their  
179 neighbouring genes, while the remainder (*CUT494/SUT053/SUT468Δ*, *SUT532Δ*, *SUT035Δ*,  
180 and *SUT125Δ*) also revealed altered levels of distantly located transcripts. Strikingly, over  
181 one-third of the deletion mutants studied by RNA-seq had large numbers (>100) of  
182 differentially expressed (DE) coding and non-coding transcripts (Table 1).

183

184

185 **Table 1.** Numbers of protein-coding genes and non-coding transcripts that are differentially  
 186 expressed in 18 SUT and CUT deletants. A ‘neighbour’ gene or transcript is defined as an  
 187 adjacent genomic feature.

|                   |                              | Protein- coding genes |                |                 |                   | Non-coding DNA           |                |                 |                         |
|-------------------|------------------------------|-----------------------|----------------|-----------------|-------------------|--------------------------|----------------|-----------------|-------------------------|
|                   | SUT/CUT                      | Number of DE genes    | Up - Regulated | Down- Regulated | Neighbour DE gene | Number of DE transcripts | Up - Regulated | Down- Regulated | Neighbour DE transcript |
| <b>Cluster 1</b>  | SUT035                       | 701                   | 256            | 445             | 1                 | 232                      | 138            | 94              | 0                       |
|                   | SUT125                       | 721                   | 310            | 411             | 2                 | 196                      | 106            | 90              | 0                       |
| <b>Cluster 2</b>  | SUT126                       | 787                   | 335            | 452             | 0                 | 223                      | 141            | 82              | 0                       |
| <b>Cluster 5</b>  | SUT532                       | 408                   | 236            | 172             | 0                 | 92                       | 55             | 37              | 1                       |
| <b>Cluster 7</b>  | CUT494/<br>SUT530/<br>SUT468 | 137                   | 102            | 35              | 1                 | 32                       | 6              | 26              | 0                       |
|                   | CUT123                       | 0                     | 0              | 0               | 0                 | 0                        | 0              | 0               | 0                       |
|                   | CUT248                       | 2                     | 2              | 0               | 0                 | 0                        | 0              | 0               | 0                       |
| <b>Cluster 8</b>  | SUT129                       | 16                    | 8              | 8               | 0                 | 2                        | 1              | 1               | 0                       |
|                   | SUT304/<br>SUT730            | 1                     | 0              | 1               | 0                 | 0                        | 0              | 0               | 0                       |
|                   | SUT329                       | 1                     | 0              | 1               | 0                 | 0                        | 0              | 0               | 0                       |
|                   | SUT722                       | 1                     | 1              | 0               | 1                 | 0                        | 0              | 0               | 0                       |
| <b>Cluster 9</b>  | SUT171                       | 2                     | 1              | 1               | 1                 | 0                        | 0              | 0               | 0                       |
|                   | SUT346                       | 1                     | 0              | 1               | 0                 | 0                        | 0              | 0               | 0                       |
|                   | SUT465                       | 0                     | 0              | 0               | 0                 | 0                        | 0              | 0               | 0                       |
| <b>Cluster 10</b> | CUT442                       | 2                     | 0              | 2               | 0                 | 0                        | 0              | 0               | 0                       |
|                   | SUT099                       | 2                     | 1              | 1               | 1                 | 0                        | 0              | 0               | 0                       |
|                   | SUT451                       | 0                     | 0              | 0               | 0                 | 0                        | 0              | 0               | 0                       |
|                   | SUT492                       | 1                     | 0              | 1               | 0                 | 0                        | 0              | 0               | 0                       |

188

189 Half of the deletion mutant strains had smaller numbers of differentially expressed  
 190 transcripts, while only three deletion mutants did not lead to transcriptional changes in rich  
 191 medium. Overall, transcription profiles of the ncRNA deletion mutants correlated well with their  
 192 fitness changes. For instance, heterozygous deletions of the two essential ncRNAs SUT075  
 193 and snR30 have overall a stronger negative effect on strain fitness in all the conditions tested  
 194 (S1 Fig). As expected, these deletions affected the largest number of transcripts (Table 2).



**Table 2.** Differentially expressed protein-coding genes and non-coding transcripts in heterozygous deletions of the essential ncRNA genes *snR30* and *SUT075*.

|        | Protein-coding genes |                |                |           | Non-coding DNA           |                |                |           |
|--------|----------------------|----------------|----------------|-----------|--------------------------|----------------|----------------|-----------|
|        | Number of DE genes   | Up - Regulated | Down-Regulated | Neighbour | Number of DE transcripts | Up - Regulated | Down-Regulated | Neighbour |
| snR30  | 2276                 | 1063           | 1213           | 0         | 408                      | 335            | 73             | 2         |
| SUT075 | 2284                 | 1057           | 1227           | 1         | 292                      | 238            | 54             | 0         |

195

196

197

198

199

200

201

202

203

204

205

206

207

208

209

210

211

212

213

214

215

216

The two apparently unrelated essential ncRNAs, SUT075 and snR30, have a surprisingly large number of DE transcripts in common (about 80%; 864 up-regulated and 972 down-regulated). Gene Ontology (GO) analysis of the shared DE protein-coding genes revealed enrichment for ribosome biogenesis, ribosomal RNA processing, DNA replication and the cell cycle (S2 Fig). This GO enrichment is consistent with the known role of snR30 in ribosomal RNA processing [37]. SUT075 is required for normal transcript levels of its neighbouring essential gene *PRP3* and can act in *trans* [10]. We note however, in our RNA-seq data, that the down-regulation of *PRP3* was not significantly strong (fold change, FC, 0.7) in *SUT075Δ* and instead a large global effect on the transcriptome was detected, including targets in common with the snR30 mutant. A further 481 essential genes are affected in addition to *PRP3* when SUT075 is deleted (82 up-regulated and 399 down-regulated) representing 43% of the *S. cerevisiae* essential genes. As a comparison, *snR30Δ* dysregulates 450 essential genes (ca. 40%), up-regulating and down-regulating 82 and 368, respectively. Nineteen small RNAs are dysregulated in *snR30Δ*, including the essential snR19 and LSR1 (U1 and U2 snRNAs) that are part of the major spliceosome in yeast, and the RNA component of nuclear RNase P (*RPR1*) and RNase MRP (*NME1*). Interestingly, 17 snoRNAs, of which 11 are in common with *snR30Δ*, are also differentially expressed in *SUT075Δ*. Our data suggest that several factors, including an effect on the neighbouring gene *PRP3* and a potential role in rRNA processing, may cause the essentiality of SUT075.

217 **Discordant changes between transcriptome and fitness as a tool to reveal**  
218 **additional context-dependent phenotypes**

219

220 Generally, the clusters containing ncRNA deletion mutants that do not impair fitness  
221 also do not produce significant global transcriptional changes and vice-versa. However, there  
222 was one exception to this pattern in cluster 7 that contained ncRNA deletion mutants with  
223 largely unaffected fitness except for *CUT494/SUT053/SUT468Δ*. The deletion of  
224 *CUT494/SUT053/SUT468* caused the dysregulation of over 150 transcripts, in contrast to the  
225 deletion of *CUT123* or *CUT248*, which affected 0 and 2 transcripts respectively. To investigate  
226 this apparent discrepancy, we used GO analysis to identify enriched functional categories  
227 across the 137 DE genes in *CUT494/SUT053/SUT468Δ*. The majority of the over-represented  
228 GO terms were related to the synthesis of crucial membrane components and membrane  
229 fluidity pathways. Specifically, GO biological process categories enriched among down-  
230 regulated genes included sterol, steroid, ergosterol and lipid biosynthesis, while up-regulated  
231 genes were clustered in pathways for propionate metabolism, drug response and molecular  
232 transport (S3 Fig). Ergosterol (ERG) is an essential membrane component that regulates  
233 membrane fluidity, permeability, membrane-bound enzyme activity and substance  
234 transportation [38]. Overexpression or deletion of ERG biosynthesis genes results in the  
235 accumulation of toxic intermediates, alteration of drug sensitivity and slow growth in different  
236 media, including non-fermentable carbon sources [39]. Interestingly, our fitness data revealed  
237 a growth defect of the *CUT494/SUT053/SUT468Δ* strain in YP+2% Glycerol (Fig 2C). To test  
238 the hypothesis that *CUT494/SUT053/SUT468Δ* has a role in membrane stability by targeting  
239 synthesis of ERG, we used azole antifungal agents that inhibit various steps in the  
240 ERG biosynthesis pathway [40]. When the fitness of *CUT494/SUT053/SUT468Δ* was tested  
241 in medium supplemented with either fluconazole (Fig 3A and C) or miconazole (Fig 3B and  
242 D), a slow growth phenotype was identified compared to the WT and the other deletion

243 mutants in the same cluster (Fig 3). This result suggests that transcriptome data can be used  
244 to identify environmental conditions that are likely to reveal fitness defects.

## 245 **ncRNAs with related phenotypes regulate common genes involved in** 246 **mitochondrial functions**

247 SUTs/CUTs clustered together by their fitness profile are expected to engage similar  
248 biological and molecular functions. To test this premise, we identified the set of common DE  
249 genes across deletion mutant strains that are part of the same phenotypic cluster.  
250 Remarkably, SUT125, SUT126 and SUT035 (clusters 1 and 2) dysregulate 481 coding genes  
251 (286 downregulated and 195 up-regulated) and 126 non-coding transcripts in common (Fig  
252 4A and B). Moreover, those ncRNA deletion mutants displayed negative fitness during  
253 phenotypic analysis when growing in 22 out of the 23 media tested. To demonstrate the  
254 accuracy of our gene expression measurements, we selected a few candidate DE genes from  
255 the deletion mutants in clusters 1 and 2, and tested their mRNA levels by RT-qPCR. Among  
256 the selected genes, down-regulated and up-regulated expression fold change by qPCR were  
257 similar to the expression fold change obtained from the RNA-Seq data (S4 Fig and S2  
258 Dataset), validating the RNA-seq data.

259 To identify the biological processes associated with the commonly misregulated genes  
260 in clusters 1 and 2, the set of DE genes was analysed for GO term enrichment and the most  
261 significant hits were selected. Genes with decreased and increased expression were  
262 associated with key mitochondrial functions such as mitochondrial electron transport and  
263 oxidation-reduction process (S5 Fig). The enriched pathways identified from KEGG and  
264 Reactome data (Holm-Bonferroni correction) were branched amino acid biosynthesis (p-value  
265  $5e-4$  7 matches), aerobic respiration, electron transport chain (p-value=0.002 11 matches),  
266 mevalonate pathway (p-value= 0.004 5 matches) and TCA cycle (p-value= 0.021 9 matches),  
267 also indicating roles in mitochondrial functions. When strains in cluster 5 are included along  
268 with clusters 1 and 2, there are 96 protein-coding genes (Fig 5) and 15 non-coding genes  
269 dysregulated in common (S6 Fig). Those common genes have, in general, a concordant

270 expression profile between each ncRNA deletion mutant strain. However, for 40% of the  
271 common genes, specifically those involved in mitochondrial function, an opposite expression  
272 trend is detected in the *SUT532Δ* strain (cluster 5) compared to *SUT125Δ*, *SUT126Δ* and  
273 *SUT035Δ*. Since the phenotypes of *SUT125Δ*, *SUT126Δ*, *SUT035Δ* and *SUT532Δ* mutants  
274 in different environmental conditions are similar; these 18 genes with different directionality of  
275 expression may either not be crucial for the observed phenotype, or specific to the mechanism  
276 of action for SUT532 in the cell (Fig 5). Due to the divergent fitness shown in glycerol for  
277 *SUT532Δ* strain we sought to elucidate if there are specific mitochondrial pathways in which  
278 SUT532 could be involved. Thus, GO of the non-common genes (321) for this ncRNA deletion  
279 mutant was also performed. Interestingly, up-regulated genes are related to the TCA cycle  
280 and aerobic respiration along with protein refolding and response to stress. Down-regulated  
281 genes are mainly involved with leucine biosynthesis biological process. (S7 Fig). Taken  
282 together, these results reveal enrichment of mitochondrial roles for SUT125, SUT126, SUT035  
283 and SUT532 suggesting their potential function in repressing or activating mitochondrial  
284 metabolic pathways, justifying the fitness impairment of those deletion mutants when grown  
285 with non-fermentative carbon sources.

## 286 **ncRNAs drive global transcriptome changes through transcription factors**

287

288 The finding that large numbers of genes involved in the same pathways are DE in  
289 ncRNA deletion mutant strains led us to hypothesize that these ncRNAs may be acting via  
290 sequence-specific transcription factors (TFs) that regulate these groups of genes. Using the  
291 YEASTRACT database [41–44], we identified TFs that are up- or down-regulated in *SUT125Δ*,  
292 *SUT126Δ*, *SUT035Δ*, *SUT532Δ* and *CUT494/SUT053/SUT468Δ* mutants, which all show  
293 large transcriptional changes. We found that several TFs were significantly perturbed in  
294 *SUT125Δ*, *SUT126Δ*, *SUT035Δ*, *SUT532Δ* and *CUT494/SUT053/SUT468Δ*, affecting ca  
295 16%, 19%, 20%, 13% and 5% of all annotated yeast TFs (ca. 183), respectively. The number  
296 of TFs with altered expression is significant in *CUT494/SUT530/SUT468Δ*, *SUT126Δ*,

297 *SUT035Δ*, and *SUT532Δ* with p-values lower than 0.05 upon chi-square test (S2 Table).  
298 Several DE TFs, such as *PDR3*, *MOT3* and *YOX1*, were shared among *SUT125Δ*, *SUT126Δ*,  
299 *SUT035Δ* (S8 Fig). The expression changes for these three TFs were validated with *SUT126Δ*  
300 via real time PCR (S5 Fig), showing a strong agreement between the qPCR and RNA seq  
301 data.

302 As the most significant fitness phenotypes observed for ncRNA deletion mutant strains  
303 were in YP or YPD media supplemented with ethanol, we identified those TFs whose mis-  
304 regulation has been linked to ethanol resistance. Many ethanol-tolerance genes share a TF-  
305 binding motif recognized by Pdr1 and Pdr3 [45]. In the *S. cerevisiae* genome, 12.39% of genes  
306 are Pdr3 targets [44]. Strikingly, about 95% ( $p < 0.0001$ ) of DE genes in *SUT126Δ*, *SUT125Δ*  
307 and *SUT035Δ* are targets of this zinc finger protein that acts predominantly as a transcriptional  
308 activator [44, 47, 48] and whose transcript levels significantly increase in the same ncRNA  
309 deletion mutant strains (S2 Dataset and S5E Fig). Furthermore, *MNS4*, which encodes a key  
310 regulator for ethanol tolerance [45,48], is up-regulated when *SUT532* is deleted and down-  
311 regulated when *SUT035* is deleted (S2 Dataset). Accordingly, 40.4% of dysregulated genes  
312 in the *SUT532Δ* and 37.7% in *SUT035Δ* are targets of Msn4. These data suggest that  
313 *SUT125*, *SUT126*, *SUT035* and *SUT532* ncRNAs are associated with mechanisms of ethanol  
314 tolerance that may involve a massive gene expression reprogramming resulting from the shift  
315 from fermentative to non-fermentative metabolism. Moreover, they imply that ncRNAs may be  
316 part of the activation or repression of metabolic pathways and regulatory networks through  
317 modulation of TFs.

318 To test whether the upregulation of Pdr3 target genes upon ncRNA deletion is Pdr3-  
319 dependent, we investigated the expression of previously validated Pdr3p target genes [46,  
320 50–53] in the *SUT126Δ* background. We found that the *SUT126* deletion is not sufficient to  
321 activate Pdr3 target genes *ACO1*, *BDH2* or *RSB1* in the absence of Pdr3 (Fig 6). These results  
322 suggest that the global effect on the transcriptome observed in the absence of *SUT126* is  
323 likely driven by an effect of this ncRNA on TFs such as Pdr3. *SUT126* may have a repressive

324 effect on the promoter of *PDR3*, may destabilize the *PDR3* transcript, or, as *PDR3* is  
325 autoregulated, may bind to and interfere with the Pdr3 protein. Several ncRNAs have been  
326 reported to bind transcription factors to regulate gene expression in other organisms. For  
327 example, in mice, the long-ncRNA (lncRNA) *linc-YY1*, involved in myogenesis, has been found  
328 to interact with the TF *YY1* [24]. Similarly, *GAS5* interacts with glucocorticoid receptors,  
329 suppressing their binding with glucocorticoid response elements [26]. In humans, lncRNA  
330 rhabdomyosarcoma 2-associated transcript (RMST) interacts directly with Sox2, a  
331 transcription factor involved in the regulation of embryonic development [54]. Regulation of  
332 gene expression by ncRNAs acting through transcription factors might, therefore, be a  
333 conserved mechanism among eukaryotes. In this way ncRNAs could confer an extra  
334 advantage to yeast cells by modulating gene expression in response to environmental stress.

### 335 **Phenotypic and transcriptional effects of the *KanMX* cassette used to generate** 336 **ncRNA deletions on neighbouring genes**

337

338 The *kanMX* cassette used to make the ncRNA deletion mutant strains has been  
339 suggested to affect the expression of neighbouring genes, either because of its high  
340 transcriptional level or via the generation of unexpected antisense transcripts [55–58]. We did  
341 not observe any alteration in transcript levels of neighbouring genes in the majority (13/20) of  
342 the ncRNA deletion mutant strains that we studied (Table 1) but levels of one or both  
343 neighbouring transcripts were affected in the remainder and might, therefore, contribute to the  
344 observed changes in phenotype and gene expression. For example, *SUT125Δ*, besides  
345 globally affecting the transcriptome, also has an effect on both of its neighbouring genes, *PIL1*  
346 and *PDC6*. Levels of *PIL1 mRNA* are reduced while *PDC6* transcript levels are higher in the  
347 mutant. (S3 Fig and S2 Dataset) To test whether *kanMX* cassette insertion replacing *SUT125*  
348 causes the local expression changes, the mRNA levels of *PDC6* and *PIL1* were quantified  
349 and compared in three different *SUT125* deletion mutant strains containing: *i.* the *kanMX*  
350 cassette in sense orientation relative to *SUT125*; *ii.* the *kanMX* cassette in antisense

351 orientation relative to *SUT125*; *iii.* a *loxP* scar after *kanMX* excision with the Cre/*loxP* system  
352 (i.e. no *kanMX* cassette). The down-regulation of the expression of *PIL1* remains the same in  
353 all three mutants, ruling out a transcriptional effect of the *kanMX* cassette on *PIL1* expression  
354 (Fig 7A). *PDC6* is up-regulated in all three mutants, however the effect is stronger when the  
355 *kanMX* cassette is removed (Fig 7B). This result suggests a partial effect of the *kanMX* on  
356 *PDC6* expression, where the presence of the cassette either in sense or antisense orientation  
357 dampens the up-regulatory effect.

358 To identify whether *PIL1* down-regulation and *PDC6* overexpression trigger the growth  
359 changes observed in *SUT125Δ* in medium containing ethanol we carried out spot test growth  
360 assays. *PDC6* was overexpressed from a plasmid to mimic up-regulation, and a *PIL1* deletion  
361 strain was used to mimic *PIL1* downregulation. The combined effect was scored in a *PIL1Δ*  
362 strain harbouring the *PDC6* overexpression plasmid. Presence or absence of the *kanMX*  
363 cassette reveals little to no effect on the resulting phenotype (Fig 8). Overexpression of *PDC6*  
364 in a WT background produced the same phenotype as a *SUT125* deletion, while either *PIL1Δ*  
365 or *PDC6Δ* deletion did not have any effect on the phenotype (Fig 8). The concomitant effect  
366 of over-expressing of *PDC6* in *PIL1Δ* strain produced a less severe, but still comparable,  
367 phenotype to that of a *SUT125* deletion. These data suggest that *PDC6* overexpression alone  
368 may account for the majority of the phenotype following *SUT125Δ* deletion.

369 The effect of the *kanMX* cassette on growth phenotypes was also tested in *SUT126Δ*,  
370 which has a fitness impairment, and *SUT129Δ*, which displays a fitness gain. Similar fitness  
371 profiles were observed regardless of the presence or absence of *kanMX* for all the ncRNA  
372 mutants (Fig 9). In addition, the effect of the *kanMX* selectable marker on transcription of non-  
373 neighbouring DE genes was tested by quantifying and comparing the mRNA levels of Pdr3p  
374 and Yox1p transcription factors in *SUT126* and *SUT125* deletion mutant strains with and  
375 without *kanMX*. No significant differences in the expression levels of *YOX1* and *PDR3* were  
376 detected (S9 Fig). In summary, these data indicate that phenotypic and transcriptional  
377 changes observed in these ncRNA deletion mutants are not dependent on the presence of an  
378 actively transcribed drug resistance marker gene. Moreover, the majority of the ncRNA

379 deletion mutants tested do not have any effect on transcript levels of neighbouring genes,  
380 suggesting a genuine effect on distant genetic loci in *trans*.

## 381 **ncRNAs SUT125, SUT126, SUT035 and SUT532 act in *trans* to regulate target** 382 **genes**

383 The deletion of SUT126, SUT125, SUT035 or SUT035 led to widespread changes in  
384 the global transcription network (S2 Dataset). These ncRNAs may therefore function in *trans*  
385 by affecting distant genes. To test this hypothesis, ectopically expressed SUT125, SUT126,  
386 SUT035 and SUT532 were assessed for their ability to rescue growth defects in the presence  
387 of 5% ethanol. Each of these SUTs was placed under control of an inducible *GAL1* promoter  
388 on a plasmid that was transformed into the respective deletion mutant. Under conditions where  
389 the *GAL1* promoter is repressed (glucose) there were no differences in growth between  
390 deletion strains carrying the *GAL1-SUT* plasmid or an empty version of this plasmid. However,  
391 when *GAL1*-driven expression was induced (galactose), all four SUTs were able to rescue the  
392 growth defect (Fig 10). These results suggest that SUT126, SUT126, SUT035 and SUT532  
393 can act *in trans*, which may underlie the altered regulation of large numbers of genes in these  
394 mutants. There are only a handful of examples of *trans* acting ncRNAs in yeast but a CUT that  
395 affects gene regulation, CUT281, can act both in *cis* and *trans* to repress the *PHO84* gene [6,  
396 36], while SUT457 can act in *trans* to rescue the phenotype of telomeric overhang  
397 accumulation observed in *SUT457Δ* cells [9].

## 398 **Conclusion**

399 Large-scale phenotypic projects using deletion mutant collections have proven to be  
400 an invaluable tool for linking genes to their function [59–62]. Here we used 372 haploid strains  
401 from the ncRNA deletion collection [10] to identify deletions that are responsible for phenotypic  
402 changes in 23 environmental conditions. The fitness data obtained has been integrated into  
403 the Yeast ncRNA Analysis (YNCA) database (<http://sgjlab.org:3838/ynca/>) [10]. Based on the  
404 phenotypic screening data, we further analysed 20 ncRNA deletion mutants at the



405 transcriptome level. ncRNA deletion mutants that were phenotypically impaired also triggered  
406 significant changes in the gene regulatory network. By analysing the expression data, we  
407 identified specific pathways where these SUTs and CUTs were functioning, such as  
408 mitochondrial function and respiration, ethanol tolerance, rRNA processing, plasma-  
409 membrane fluidity and sterol biosynthesis. In the *SUT126* $\Delta$  strain, we showed that the large  
410 transcriptional changes are due to the altered expression of TFs rather than the direct effect  
411 of the lncRNA deletion. These results indicate that ncRNAs are likely to be involved in fine  
412 tuning expression by regulating the expression of TFs.

413 Gene regulation driven by ncRNAs through TFs may be a conserved mechanism  
414 amongst eukaryotes. Examples of ncRNAs enhancing the loading of TFs at their target  
415 promoters or acting as a binding competitors for DNA/RNA binding proteins in fission yeast,  
416 mouse and human cells are increasing [23–26]. In fact, most ncRNAs are transcribed near  
417 regulatory units for transcription such as promoters or enhancers [17, 18, 63], which may be  
418 an indication that associates them with biological function and mechanism.

419 We discovered that SUT125, SUT126, SUT532 and SUT035 act in *trans* since their  
420 functions can be rescued ectopically. Strikingly, these ncRNAs originate from intergenic  
421 regions that do not overlap with any open reading frame, bearing out the possibility that their  
422 functionality may be linked with their potential to form accessible structural domains able to  
423 bind to DNA, RNA or proteins [64–66]

424 Such ncRNA mediated regulation is cost-effective compared to the classical regulation  
425 via TFs as the fast production of RNAs compared to proteins facilitates quick genetic  
426 responses to environmental stimuli.

## 427 **Materials and methods**

### 428 **Yeast strains, growth conditions and plasmids**

429 A list of *Saccharomyces cerevisiae* strains and plasmids is provided in S3 Table. For  
430 strain maintenance and construction, strains were grown at 30°C under standard conditions.

431 ncRNA single deletion strains used this study were taken from the ncRNA deletion collection  
432 created by Parker, et al [10,67]. Deletion mutants were maintained on Yeast extract Peptone  
433 Dextrose Agar (YPDA) containing 200 µg/mL G418. Double deletion mutant strains were  
434 constructed by substituting the candidate *SUT* locus with the *natNT2* cassette and were  
435 maintained on YPDA containing 100 µg/mL clonNAT.

436

437 For construction of strains ectopically expressing particular SUTs, isogenic wild-type  
438 and ncRNA deletion mutant strains cells were transformed with pRS416-Gal1-Cyc1  
439 overexpression plasmid containing the ncRNA of interest. Resulting strains were maintained  
440 in a synthetic minimal media lacking uracil (SD-Ura: 1X Yeast Nitrogen Base (YNB)  
441 (Formedium); 1X Complete Supplement Mixture (CSM) – Ura (Formedium); 2% (w/v)  
442 glucose). For phenotypic rescue studies, strains were grown to an optical density at 600 nm  
443 (OD<sub>600</sub>) of 0.5 in YP (1% yeast extract, 2% peptone) medium supplemented with 2% raffinose  
444 (YPRaf) at 30°C and induced with YP medium containing 2% galactose (YPGal) for 2 hours  
445 before being harvested for spot test assays.

#### 446 **Cre recombinase-mediated marker excision in *Saccharomyces cerevisiae***

447 SUT deletion strains containing loxP sites flanking the *kanMx* cassette were transformed with  
448 pSH-ble<sup>r</sup> plasmid DNA, and grown on YPDA containing 10 µg/mL phleomycin. To excise the  
449 cassette, cells harboring pSH-ble<sup>r</sup> were grown overnight in YPRaf medium, re-suspended in  
450 10 ml YPGal medium to an OD<sub>600</sub> of 0.3 and incubated at 30°C for 3 h. The culture was  
451 diluted and plated out on YPDA. The resulting colonies were replica-plated on YPDA  
452 containing 200 µg/mL G418 to confirm the marker loss and YPDA with 10 µg/mL phleomycin  
453 to confirm the plasmid loss. The marker loss was also verified by colony PCR.

#### 454 **Phenotypic analysis on solid and liquid media**

455 Two biological and four technical replicates of the haploid deletion mutant strains were  
456 arrayed in 384 well microtitre plates. Using a Singer Rotor HDA, the 384 well cell cultures were

457 stamped onto YPDA plates and replica plated onto 23 different environmental conditions and  
458 incubated at a particular temperature. A full list of the media and temperatures used in this  
459 study are listed in S5 Table. Plates were imaged at 24, 48 and 72 hours using a Bio-Rad Gel  
460 Doc XR system and images were processed using SGAtools [68]. The average pixel count for  
461 the replicates of each strain were then normalized to the appropriate plate wild-type value then  
462 mean, standard deviation and p-values were calculated assuming a normal distribution of  
463 values. Strains with similar growth in different media were grouped into specific clusters.

464 For liquid fitness assays, cells were grown at 30°C from an OD<sub>600</sub> nm of 0.1, and growth  
465 measurements at OD<sub>595nm</sub> were recorded using a BMG FLUOstar OPTIMA Microplate  
466 Reader. The readings were taken every 5 minutes as previously described by Naseeb and  
467 Delneri [69] for up to 55 hours incubation time. Three technical replicates of three independent  
468 biological samples were used for each deletion mutant and wild-type strain. Graphs and  
469 growth parameters were produced using the *grofit* package of the R program.

470 For spot test assays, cultures were grown overnight before being serially diluted 1:10  
471 and spotted onto agar plates.

## 472 **Total RNA extraction and quantitative RT-PCR**

473 Total RNA was isolated from 1x10<sup>7</sup> cells using the RNeasy Mini Kit (QIAGEN,  
474 Germany) following the protocol for enzymatic digestion of cell wall followed by lysis of  
475 spheroplasts. To eliminate genomic DNA contamination, an additional DNase treatment was  
476 performed with RNase-free DNase set (QIAGEN, Germany) following the manufacturer's  
477 protocol. The RNA extracted was quantified using a NanoDrop LiTE Spectrophotometer  
478 (THERMO SCIENTIFIC, United States). Two micrograms of total RNA were reverse  
479 transcribed into cDNA using SuperScript III Reverse Transcriptase (Invitrogen, UK) according  
480 to the manufacturer's protocol. Optimized qPCR reactions contained 2ng/μl of cDNA, 3pmol  
481 each primer and 5 μl of iTaq Universal SYBR Green super Mix 2X in a final volume of 10 μl.  
482 Reactions were cycled on a Roche Light Cycler real time System for 35 cycles of: 15 seconds  
483 at 95°C; 30 seconds at 57°C ;and 30 seconds at 72°C. Three biological replicates and three

484 technical replicates per sample were used in each experiment, and all runs included a no  
485 template control, and a control lacking reverse transcriptase. The relative expression of each  
486 gene was estimated using the Ct values relative to those of *ACT1*. Primers were designed to  
487 produce an amplicon of 80-150bp (Sequences given in S4 Table).

## 488 **Illumina HiSeq library preparation and sequencing**

489 Libraries were prepared from total RNA using the TruSeq Stranded mRNA Library Prep  
490 Kit (Illumina, Inc) according to the manufacturer's instructions. Sequencing was performed on  
491 an Illumina HiSeq4000 instrument. Sequences corresponding to protein-coding genes were  
492 mapped to *sacCer3*, while CUT and SUT sequences were mapped using the genomic  
493 coordinates provided by Xu et al [17]. Mapping was performed using STAR [70]. Differential  
494 gene expression analysis was based on the negative binomial distribution (DESeq2) [71].  
495 Genes with a statistically significant difference in expression from wild-type, as indicated by a  
496 q-value below 0.1, and greater than 1.5 fold change in expression, were included in the final  
497 list of differentially expressed genes.

## 498 **Bioinformatic and statistical analyses.**

499 Differentially expressed genes were listed and grouped as up- or down-regulated. Enriched  
500 GO terms and pathways were identified using YeastMine, with the Helmed- Bonferroni  
501 correction used to calculate adjusted *p*-values [72]. The Yeast Search  
502 for Transcriptional Regulators And Consensus Tracking (YEAstract) [44] database was  
503 used to look for transcription factors and their target genes.

504

505 Statistical tests were performed using Welch two sample t-test and multiple comparisons were  
506 analysed using ANOVA followed by Dunnett's test. Error bars denote standard deviations  
507 except where noted and *p*-values are indicated on Figs as: . \*  $p < 0.05$  \*\*  $p < 0.01$  \*\*\*  $p < 0.001$   
508 \*\*\*\*  $p < 0.0001$ ; ns = no significant change.

## 509 Fig Legends

### 510 Fig 1. ncRNA deletion strain fitness profiles on solid media in different environments.

511 Heat-map of the 42 clusters containing 372 haploid ncRNA deletion strains. Rows represent  
512 the different growth conditions and columns represent the clusters. Colour bars represent the  
513 colony size normalized to the wild-type strain which is given the arbitrary growth value of 1.  
514 Fitness reduction is represented as shades of red. Fitness increased is represented as shades  
515 of green. No fitness change is represented as yellow. Missing data is represented as white.  
516 The list of deletion mutant strains in each cluster can be found in Supporting information S1  
517 Dataset.

518

### 519 Fig 1. Liquid growth assays for SUT and CUT deletants with pronounced growth

520 differences on solid media. Bar charts show the relative area under the curve for haploid  
521 SUT and CUT deletion strains grown in (A) YPD+10% Ethanol (B) YP+ 5% Ethanol and (C)  
522 YP+2% Glycerol. The data are presented as means calculated from three biological replicates  
523 normalized to WT. Comparisons between wild-type and mutants were analysed using ANOVA  
524 followed by Dunnett's test.

525

### 526 Fig 3. Liquid growth assays of ncRNA deletion mutants in the presence of azoles.

527 Growth curves of *CUT123Δ*, *CUT248Δ*, *CUT494/SUT530/SUT468Δ* and WT strains in YPD  
528 media supplemented with (A) Fluconazole (10 mg/μl) and (B) Miconazole (1 μM). Bar charts  
529 show the mean specific growth rate (μ) of WT and ncRNA deletion strains in the presence of  
530 (C) fluconazole (10 mg/μl) and D) miconazole (1 μM). Significance of differences was  
531 assessed by *t*- tests.

532

### 533 Fig 4. Deletion mutant strains displaying identical fitness profiles share a significant

534 number of differentially expressed coding and non-coding transcripts. Area proportional  
535 Venn diagrams displaying the number of differentially expressed (A) Protein-coding genes (p-

536 value= 2.04e-60 and (B) Non-coding transcripts (p-value=2.11e-18) in common between  
537 *SUT125Δ*, *SUT035Δ* and *SUT126Δ*. Venn diagrams were generated with BioVenn [73].

538

539 **Fig 5. Heat map of differentially expressed genes in common between ncRNA deletion**  
540 **mutants with similar fitness profiles.** Heat map was constructed with 96 common DE genes  
541 between *sut125Δ*, *SUT126Δ*, *SUT035Δ* and *SUT532Δ*. Colours represent the change in  
542 expression of genes, as indicated in the key on the right. DE genes in *SUT532Δ* with different  
543 transcriptional directionality from the other three ncRNA deletants are boxed.

544

545 **Fig 6. Indirect gene expression changes may be driven by SUT126 ncRNA acting**  
546 **through transcription factors.** Relative mRNA levels of A) *ACO1*, B) *BDH2*, and C) *RSB1*  
547 analysed by RT-qPCR with *SUT126Δ/PDR3Δ* single and double mutants. The increased  
548 levels of *PDR3* targets in the *SUT126Δ* single mutant are dependent on Pdr3 (*t*-test).

549

550 **Fig 7. Actively transcribed *kanMX* partially decreases the regulatory effect of**  
551 **neighbouring genes in *SUT125* deletion strains.** Transcriptional changes of *SUT125*  
552 neighbouring genes (A) *PIL1* and (B) *PDC6* in *SUT125Δ* mutant strains with sense, antisense  
553 orientations (relative to *SUT125*) of the *kanMX* cassette, and without *kanMX* after excision  
554 with the Cre/loxP system. Relative mRNA levels were quantified by qPCR and compared by  
555 *t*-test.

556

557 **Fig 8. *PDC6* overexpression may explain the majority of the *SUT125Δ* phenotype.** Spot  
558 test assay of: *SUT125Δ* deletion strains with and without *kanMX*; *PIL1Δ* deletion strain; *PDC6*  
559 overexpression strain; and *PIL1Δ* with *PDC6* overexpression plasmid plated on (A) Synthetic  
560 minimal medium lacking uracil (SD-Ura) and (B) SD-Ura + 5% ethanol, containing either 2%  
561 glucose or 2% galactose as indicated below each panel. The *PDC6* overexpression plasmid  
562 has the *PDC6* gene under control of the inducible *GAL1* promoter in the pRS416 plasmid.

563 Wild-type and deletion strains containing the pRS416Gal1Cyc1 (empty plasmid) and the  
564 *PDC6Δ* deletion strain were included as controls.

565

566 **Fig 9. Presence or absence of the *kanMX* cassette does not affect growth phenotypes**  
567 **in ncRNA deletion strains.** Spot test assay of: BY4741 (WT), *SUT126Δ* and *SUT129Δ* with  
568 and without *kanMX* on (A) YPD; (B) YP+ 2% Glycerol; and (C) YP+ 5% Ethanol.

569

570 **Fig 10. SUTs whose deletion results in wide-spread transcriptional changes can rescue**  
571 **growth phenotypes in *trans*.**

572 Rescue spot test analysis of growth phenotypes of ncRNA deletion mutant strains containing  
573 the indicated SUT under control of the *GAL1* promoter, spotted onto SD + 5% ethanol,  
574 containing either 2% glucose (A) or 2% galactose (B). +: pRS416 with the respective SUT;  
575 - : empty plasmid.

576

577 **Author Contributions:** DD, CBM and ROK conceived the study; DD, CBM and LNB  
578 designed the experiments; LNB, SP and MF performed the experiments, PW and ST  
579 contributed to the initial assembly and normalisation of RNAseq data; LNB, CBM and DD  
580 analysed data; LNB, CBM and DD wrote the paper with the input of SP and ROK.

581

## 582 **Acknowledgements**

583 We thank the Genomic Technologies and Bioinformatics Facilities in the Faculty of Biology,  
584 Medicine and Health for their contribution in the acquisition and mapping of RNA-Seq data.

585

## 586 **References**

587 1. Peschansky VJ, Wahlestedt C. Non-coding RNAs as direct and indirect modulators of

- 588 epigenetic regulation. *Epigenetics*. 2014 Jan;9(1):3–12.
- 589 2. Rando OJ, Winston F. Chromatin and transcription in yeast. *Genetics*. 2012  
590 Feb;190(2):351–87.
- 591 3. Martens JA, Laprade L, Winston F. Intergenic transcription is required to repress the  
592 *Saccharomyces cerevisiae* *SER3* gene. *Nature*. 2004;429(6991):571–4.
- 593 4. Houseley J, Rubbi L, Grunstein M, Tollervey D, Vogelauer M. A ncRNA modulates  
594 histone modification and mRNA induction in the yeast GAL gene cluster. *Mol Cell*.  
595 2008;32(5):685–95.
- 596 5. Camblong J, Iglesias N, Fickentscher C, Dieppo G, Stutz F. Antisense RNA  
597 stabilization induces transcriptional gene silencing via histone deacetylation in *S.*  
598 *cerevisiae*. *Cell*. 2007;131(4):706–17.
- 599 6. Camblong J, Beyrouthy N, Guffanti E, Schlaepfer G, Steinmetz LM, Stutz F. *Trans-*  
600 *acting antisense RNAs mediate transcriptional gene cosuppression in S. cerevisiae.*  
601 *Genes Dev*. 2009 Jul 1;23(13):1534.
- 602 7. Hongay CF, Grisafi PL, Galitski T, Fink GR. Antisense Transcription Controls Cell Fate  
603 in *Saccharomyces cerevisiae*. *Cell*. 2006;127(4):735–45.
- 604 8. Luke B, Panza A, Redon S, Iglesias N, Li Z, Lingner J. The Rat1p 5' to 3' exonuclease  
605 degrades telomeric repeat-containing RNA and promotes telomere elongation in  
606 *Saccharomyces cerevisiae*. *Mol Cell*. 2008;32(4):465–77.
- 607 9. Kyriakou D, Stavrou E, Demosthenous P, Angelidou G, San Luis B-J, Boone C, et al.  
608 Functional characterisation of long intergenic non-coding RNAs through genetic  
609 interaction profiling in *Saccharomyces cerevisiae*. *BMC Biol*. 2016;14(1):106.
- 610 10. Parker S, Fraczek MG, Wu J, Shamsah S, Manousaki A, Dungrattanalert K, et al. Large-  
611 scale profiling of noncoding RNA function in yeast. *PLOS Genet*. 2018;14(3):e1007253.
- 612 11. Fire A, Xu S, Montgomery MK, Kostas SA, Driver SE, Mello CC. Potent and specific  
613 genetic interference by double-stranded RNA in *Caenorhabditis elegans*. *Nature*.  
614 1998;391(6669):806–11.
- 615 12. Fatica A, Bozzoni I. Long non-coding RNAs: new players in cell differentiation and



- 616 development. *Nat Rev Genet.* 2014;15(1):7–21.
- 617 13. Jensen TH, Jacquier A, Libri D. Dealing with Pervasive Transcription. *Mol Cell.*  
618 2013;52(4):473–84.
- 619 14. Wu J, Delneri D, O’Keefe RT. Non-coding RNAs in *Saccharomyces cerevisiae*: what is  
620 the function? *Biochem Soc Trans.* 2012;40(4):907–11.
- 621 15. Thebault P, Boutin G, Bhat W, Rufiange A, Martens J, Nourani A. Transcription  
622 regulation by the noncoding RNA SRG1 requires Spt2-dependent chromatin deposition  
623 in the wake of RNA polymerase II. *Mol Cell Biol.* 2011;31(6):1288–300.
- 624 16. van Werven FJ, Neuert G, Hendrick N, Lardenois A, Buratowski S, van Oudenaarden  
625 A, et al. Transcription of Two Long Noncoding RNAs Mediates Mating-Type Control of  
626 Gametogenesis in Budding Yeast. *Cell.* 2012;150(6):1170–81.
- 627 17. Xu Z, Wei W, Gagneur J, Perocchi F, Clauder-Münster S, Camblong J, et al.  
628 Bidirectional promoters generate pervasive transcription in yeast. *Nature.*  
629 2009;457(7232):1033–7.
- 630 18. Neil H, Malabat C, d’Aubenton-Carafa Y, Xu Z, Steinmetz LM, Jacquier A. Widespread  
631 bidirectional promoters are the major source of cryptic transcripts in yeast. *Nature.*  
632 2009;457(7232):1038–42.
- 633 19. Wyers F, Rougemaille M, Badis G, Rousselle J-C, Dufour M-E, Boulay J, et al. Cryptic  
634 Pol II Transcripts Are Degraded by a Nuclear Quality Control Pathway Involving a New  
635 Poly(A) Polymerase. *Cell.* 2005;121(5):725–37.
- 636 20. Marquardt S, Hazelbaker DZ, Buratowski S. Distinct RNA degradation pathways and 3’  
637 extensions of yeast non-coding RNA species. *Transcription.* 2011;2(3):145–54.
- 638 21. Kornienko AE, Guenzl PM, Barlow DP, Pauler FM. Gene regulation by the act of long  
639 non-coding RNA transcription. *BMC Biol.* 2013 May 30;11(1):59.
- 640 22. Marchese FP, Raimondi I, Huarte M. The multidimensional mechanisms of long  
641 noncoding RNA function. *Genome Biol.* 2017;18(1):206.
- 642 23. Hirota K, Miyoshi T, Kugou K, Hoffman CS, Shibata T, Ohta K. Stepwise chromatin  
643 remodelling by a cascade of transcription initiation of non-coding RNAs. *Nature.*

- 644 2008;456(7218):130–4.
- 645 24. Sigova AA, Abraham BJ, Ji X, Molinie B, Hannett NM, Guo YE, et al. Transcription  
646 factor trapping by RNA in gene regulatory elements. *Science*. 2015;350(6263):978–81.
- 647 25. Riley KJ-L, Maher LJ, III. p53 RNA interactions: new clues in an old mystery. *RNA*.  
648 2007;13(11):1825–33.
- 649 26. Kino T, Hurt DE, Ichijo T, Nader N, Chrousos GP. Noncoding RNA gas5 is a growth  
650 arrest- and starvation-associated repressor of the glucocorticoid receptor. *Sci Signal*.  
651 2010;3(107):ra8.
- 652 27. Kamath RS, Bungay HR. Growth of yeast colonies on solid media. *J Gen Microbiol*.  
653 1988;134(11):3061–9.
- 654 28. Lewis MWA, Wimpenny JWT. The influence of nutrition and temperature on the growth  
655 of colonies of *Escherichia coli* K12. *Can J Microbiol*. 1981;27(7):679–84.
- 656 29. Barton DBH, Georghiou D, Dave N, Alghamdi M, Walsh TA, Louis EJ, et al. PHENOS:  
657 a high-throughput and flexible tool for microorganism growth phenotyping on solid  
658 media. *BMC Microbiol*. 2018;18(1):9.
- 659 30. Dagher SF, Ragout AL, Siñeriz F, Bruno-Bárcena JM. Cell immobilization for production  
660 of lactic acid biofilms do it naturally. *Adv Applied Microbiol*. 2010; 71:113–148.
- 661 31. Rieck VT, Palumbo SA, Witter LD. Glucose availability and the growth rate of colonies  
662 of *Pseudomonas fluorescens*. *J Gen Microbiol*. 1973;74(1):1–8.
- 663 32. Jones JC, Gray BF. Surface colony growth in a controlled nutrient environment.  
664 Dependence of growth constant on nutrient concentration. *Microbios*. 1978;23(91):45–  
665 51.
- 666 33. Gray BF, Kirwan NA. Growth rates of yeast colonies on solid media. *Biophys Chem*.  
667 1974;1(3):204–13.
- 668 34. Cooper AL, Dean AC, Hinshelwood C. Factors affecting the growth of bacterial colonies  
669 on agar plates. *Proc R Soc London Ser B Biol Sci*. 1968;171(23):175–99.
- 670 35. Bumgarner SL, Dowell RD, Grisafi P, Gifford DK, Fink GR. Toggle involving cis-  
671 interfering noncoding RNAs controls variegated gene expression in yeast. *Proc Natl*

- 672 Acad Sci. 2009;106(43):18321–6.
- 673 36. Camblong J, Iglesias N, Fickentscher C, Dieppois G, Stutz F. Antisense RNA  
674 stabilization induces transcriptional gene silencing via histone deacetylation in *S.*  
675 *cerevisiae*. Cell. 2007;131(4):706–17.
- 676 37. Piekna-Przybylska D, Decatur WA, Fournier MJ. New bioinformatic tools for analysis of  
677 nucleotide modifications in eukaryotic rRNA. RNA. 2007;13(3):305.
- 678 38. Hu Z, He B, Ma L, Sun Y, Niu Y, Zeng B. Recent Advances in Ergosterol Biosynthesis  
679 and Regulation Mechanisms in *Saccharomyces cerevisiae*. Indian Journal of  
680 Microbiology. Springer India; 2017;57:270–7.
- 681 39. Bhattacharya S, Esquivel BD, White TC. Overexpression or deletion of ergosterol  
682 biosynthesis genes alters doubling time, response to stress agents, and drug  
683 susceptibility in *Saccharomyces cerevisiae*. MBio. 2018;9(4).
- 684 40. Gebre AA, Okada H, Kim C, Kubo K, Ohnuki S, Ohya Y. Profiling of the effects of  
685 antifungal agents on yeast cells based on morphometric analysis. Nielsen J, editor.  
686 FEMS Yeast Res. 2015;15(5):fov040.
- 687 41. Abdulrehman D, Monteiro PT, Teixeira MC, Mira NP, Lourenco AB, dos Santos SC, et  
688 al. YEASTRACT: providing a programmatic access to curated transcriptional regulatory  
689 associations in *Saccharomyces cerevisiae* through a web services interface. Nucleic  
690 Acids Res. 2011;39:D136–40.
- 691 42. Teixeira MC, Monteiro P, Jain P, Tenreiro S, Fernandes AR, Mira NP, et al. The  
692 YEASTRACT database: a tool for the analysis of transcription regulatory associations  
693 in *Saccharomyces cerevisiae*. Nucleic Acids Res. 2006;34(90001):D446–51.
- 694 43. Teixeira MC, Monteiro PT, Guerreiro JF, Gonçalves JP, Mira NP, dos Santos SC, et al.  
695 The YEASTRACT database: an upgraded information system for the analysis of gene  
696 and genomic transcription regulation in *Saccharomyces cerevisiae*. Nucleic Acids Res.  
697 2014;42(D1):D161–6.
- 698 44. Teixeira MC, Monteiro PT, Palma M, Costa C, Godinho CP, Pais P, et al. YEASTRACT:  
699 an upgraded database for the analysis of transcription regulatory networks in

- 700 *Saccharomyces cerevisiae*. Nucleic Acids Res. 2018;46(D1):D348–53.
- 701 45. Ma M, Liu ZL. Mechanisms of ethanol tolerance in *Saccharomyces cerevisiae*. Appl  
702 Microbiol Biotechnol. 2010;87(3):829–45.
- 703 46. Devaux F, Carvajal E, Moye-Rowley S, Jacq C. Genome-wide studies on the nuclear  
704 PDR3-controlled response to mitochondrial dysfunction in yeast. FEBS Lett.  
705 2002;515(1–3):25–8.
- 706 47. Nishida-Aoki N, Mori H, Kuroda K, Ueda M. Activation of the mitochondrial signaling  
707 pathway in response to organic solvent stress in yeast. Curr Genet. 2015;61(2):153–  
708 64.
- 709 48. del Castillo Agudo L. Lipid content of *Saccharomyces cerevisiae* strains with different  
710 degrees of ethanol tolerance. Appl Microbiol Biotechnol. 1992;37(5):647–51.
- 711 49. Ma M, Liu LZ. Quantitative transcription dynamic analysis reveals candidate genes and  
712 key regulators for ethanol tolerance in *Saccharomyces cerevisiae*. BMC Microbiol.  
713 2010;10:169.
- 714 50. Banerjee D, Lelandais G, Shukla S, Mukhopadhyay G, Jacq C, Devaux F, et al.  
715 Responses of pathogenic and nonpathogenic yeast species to steroids reveal the  
716 functioning and evolution of multidrug resistance transcriptional networks. Eukaryot  
717 Cell. 2008;7(1):68–77.
- 718 51. Salin H, Fardeau V, Piccini E, Lelandais G, Tanty V, Lemoine S, et al. Structure and  
719 properties of transcriptional networks driving selenite stress response in yeasts. BMC  
720 Genomics. 2008;9:333.
- 721 52. Schüller C, Mammun YM, Wolfger H, Rockwell N, Thorner J, Kuchler K. Membrane-  
722 active compounds activate the transcription factors Pdr1 and Pdr3 connecting  
723 pleiotropic drug resistance and membrane lipid homeostasis in *Saccharomyces*  
724 *cerevisiae*. Mol Biol Cell. 2007;18(12):4932–44.
- 725 53. Weidberg H, Amon A. MitoCPR—A surveillance pathway that protects mitochondria in  
726 response to protein import stress. Science (80- ). 2018;360(6385).
- 727 54. Ng SY, Bogu GK, Soh BS, Stanton LW. The long noncoding RNA RMST interacts with

- 728 SOX2 to regulate neurogenesis. *Mol Cell*. 2013;51(3):349–59.
- 729 55. Nguyen T, Fischl H, Howe FS, Woloszczuk R, Barros AS, Xu Z, et al. Transcription  
730 mediated insulation and interference direct gene cluster expression switches. *Elife*.  
731 2014;3:1–21.
- 732 56. Elison GL, Xue Y, Song R, Acar M. Insights into Bidirectional Gene Expression Control  
733 Using the Canonical GAL1/GAL10 Promoter. *Cell Rep*. 2018;25(3):737-748.e4.
- 734 57. Pelechano V, Wei W, Steinmetz LM. Extensive transcriptional heterogeneity revealed  
735 by isoform profiling. *Nature*. 2013;497(7447):127–31.
- 736 58. Chen M, Licon K, Otsuka R, Pillus L, Ideker T. Decoupling Epigenetic and Genetic  
737 Effects through Systematic Analysis of Gene Position. *Cell Rep*. 2013;3(1):128–37.
- 738 59. Giaever G, Chu AM, Ni L, Connelly C, Riles L, Véronneau S, et al. Functional profiling  
739 of the *Saccharomyces cerevisiae* genome. *Nature*. 2002;418(6896):387–91.
- 740 60. Bader GD, Heilbut A, Andrews B, Tyers M, Hughes T, Boone C. Functional genomics  
741 and proteomics: charting a multidimensional map of the yeast cell. *Trends Cell Biol*.  
742 2003;13(7):344–56.
- 743 61. Winzeler EA, Shoemaker DD, Astromoff A, Liang H, Anderson K, Andre B, et al.  
744 Functional Characterization of the *S. cerevisiae* Genome by Gene Deletion and Parallel  
745 Analysis. *Science*. 1999;285(5429):901–906.
- 746 62. Delneri D, Hoyle DC, Gkargkas K, Cross EJM, Rash B, Zeef L, et al. Identification and  
747 characterization of high-flux-control genes of yeast through competition analyses in  
748 continuous cultures. *Nat Genet*. 2008;40(1):113–7.
- 749 63. Takemata N, Ohta K. Role of non-coding RNA transcription around gene regulatory  
750 elements in transcription factor recruitment. *RNA Biol*. 2017;14(1):1–5.
- 751 64. Hooks KB, Naseeb S, Parker S, Griffiths-Jones S, Delneri D. Novel intronic RNA  
752 structures contribute to maintenance of phenotype in *Saccharomyces cerevisiae*.  
753 *Genetics*. 2016;203(3):1469–81.
- 754 65. Martens L, Rühle F, Stoll M. LncRNA secondary structure in the cardiovascular system.  
755 *Non-coding RNA Research*. 2017;2:137–142.

- 756 66. Wang KC, Chang HY. Molecular Mechanisms of Long Noncoding RNAs. *Mol Cell*.  
757 2011;43(6):904–14.
- 758 67. Parker S, Fraczek MG, Wu J, Shamsah S, Manousaki A, Dungrattanalert K, et al. A  
759 resource for functional profiling of noncoding RNA in the yeast *Saccharomyces*  
760 *cerevisiae*. *RNA*. 2017;23(8):1166–71
- 761 68. Wagih O, Usaj M, Baryshnikova A, VanderSluis B, Kuzmin E, Costanzo M, et al.  
762 SGAtools: one-stop analysis and visualization of array-based genetic interaction  
763 screens. *Nucleic Acids Res*. 2013;41:W591-W596.
- 764 69. Naseeb S, Delneri D. Impact of Chromosomal Inversions on the Yeast DAL Cluster.  
765 *PLoS One*. 2012;7(8):e42022.
- 766 70. Dobin A, Davis CA, Schlesinger F, Drenkow J, Zaleski C, Jha S, et al. STAR: ultrafast  
767 universal RNA-seq aligner. *Bioinformatics*. 2013;29(1):15–21.
- 768 71. Love MI, Huber W, Anders S. Moderated estimation of fold change and dispersion for  
769 RNA-seq data with DESeq2. *Genome Biol*. 2014;15(12):550.
- 770 72. Balakrishnan R, Park J, Karra K, Hitz BC, Binkley G, Hong EL, et al. YeastMine--an  
771 integrated data warehouse for *Saccharomyces cerevisiae* data as a multipurpose tool-  
772 kit. *Database (Oxford)*. 2012;2012:bar062.
- 773 73. Hulsen T, de Vlieg J, Alkema W. BioVenn - A web application for the comparison and  
774 visualization of biological lists using area-proportional Venn diagrams. *BMC Genomics*.  
775 2008;9.
- 776 74. Larsson J (2019). eulerr: Area-Proportional Euler and Venn Diagrams with Ellipses. R  
777 package version 6.0.0, <https://cran.r-project.org/package=eulerr>.

778

## 779 **Supporting information**

### 780 **S1 Dataset.**

781 This file contains the solid fitness data of the 372 mutant strains tested in 23 different  
782 conditions. It contains a summary of the clusters and the p-value per strain per condition

783

784 **S2 Dataset.**

785 This file contains the RNA-seq data divided by mutant, containing the list of significant DE  
786 genes per mutant strain. Tables are divided by protein-coding genes and non-coding  
787 transcripts

788

789 **S1 Fig. Solid fitness of heterozygous deletions of essential ncRNAs, SUT075 and snR30**

790 Bar charts displays the colony size of *SUT075Δ* and *snR30Δ* deletion strains when growing in  
791 (A) YPD and (B) YPD supplemented with 10% ethanol.

792

793 **S2 Fig. Gene ontology for biological process enriched in DE genes in common between**

794 **snR30 and SUT075.** Bar chart displaying the 20 first significantly enriched GO terms. The  
795 negative logarithm of the adjusted p-value (base 10) after Holm-Bonferroni correction is  
796 represented on the x-axis. The figure was created using the DE genes in common for SUT075  
797 and snR30 deletion mutants. n=1836.

798

799 **S3 Fig. Histogram of GO terms from DE genes in CUT494/SUT530/SUT468Δ strain.**

800 Representative GO terms for biological processes for up-regulated (red) and down- regulated  
801 (green) genes in the *CUT494/SUT530/SUT468Δ* strain. Holm-Bonferroni p-value cutoff < 0.05;  
802 y –axis displays GO terms, x-axis shows the p-value that was transformed to  $-\log_{10}$ . The  
803 figure was created using the DE genes. n=137.

804

805 **S4 Fig. Validation of DE genes obtained during RNA-seq by qPCRs.** Relative mRNA

806 levels of (A) *PDR3* and (B) *YOX1* in *SUT035Δ* strain, (C) *PDC6* and (D) *PIL1* in *SUT125Δ* and  
807 the TFs (E) *PDR3*, (F) *YOX1* and (G) *MOT3* in *SUT126Δ* strain analyzed by RT-qPCR.  
808 Relative mRNA levels were quantified by qPCR and compared by *t*-test.

809

810 **S5 Fig. SUT125, SUT126 and SUT035 reveal an important role in mitochondrial**  
811 **processes.** Gene Ontology of biological processes inferred from dysregulated coding targets  
812 in common in *SUT125Δ*, *SUT126Δ* and *SUT035Δ* deletion strains. Significantly first enriched  
813 GO terms for biological processes (Holm-Bonferroni adjusted p-value <0.05) are listed on the  
814 y-axis, and the negative log of the adjusted p-value (base 10) is represented on the x-axis.  
815 The figure was created using the DE genes in common for SUT125, SUT126 and SUT035  
816 n=481.

817

818 **S6 Fig. Gene Ontology of biological processes inferred from DE protein coding genes**  
819 **in *SUT532Δ* deletion mutant strain.** Significantly enriched representative GO terms for  
820 biological processes for up-regulated (red, n=172) and down-regulated (green, n=236) in  
821 *SUT532Δ* deletion strain. P-value was calculated using Holm-Bonferroni correction.  
822 Representative GO terms are listed on the y-axis, and the negative log of the adjusted p-value  
823 (base 10) is represented on the x-axis.

824

825 **S7 Fig. Area proportional Venn diagram of DE transcripts between cluster 1, 2 and 5.**  
826 Number of (A) Protein coding genes (96) and (B) Non-coding transcripts (15) in common  
827 dysregulated among deletion strains in cluster 1 (*SUT125Δ*, *SUT035Δ*), 2 (*SUT126Δ*) and 5  
828 (*SUT532Δ*). Venn diagram generated using Eulerr [74]

829

830 **S8 Fig. Venn diagram representing TFs in common between phenotypic related ncRNA**  
831 **deletion mutants with significant impact on the genome.** Area proportional Venn diagram  
832 generated by BioVenn [73] using the number of TFs dysregulated in deletion strains in cluster  
833 1 (*SUT125Δ*, *SUT035Δ*) and 2 (*SUT126Δ*). The overlapping (23 TFs) is shown in a dark green  
834 colour.

835



836 **S9 Fig. Altered expression levels of target genes in ncRNA deletion mutant strains are**  
837 **independent of *kanMX* marker.** Relative mRNA levels of the transcriptional repressor (A)  
838 *YOX1* and the transcriptional activator (B) *PDR3* in *SUT125Δ* and *SUT126Δ* deletion mutant  
839 strains with and without *kanMX*. The *kanMX* cassette does not influence genes located  
840 distantly from the SUT disruption. Relative mRNA levels were quantified by qPCR and  
841 compared by *t*-test.

842

843 **S1 Table.** Characteristic parameters of growth curves of deletion mutant strains assessed in  
844 liquid media. Tables show mean values normalized with wild type, standard deviation (SD),  
845 adjusted p-value and significance per parameter.

846 **S2 Table.** List of transcription factors DE in mutant strains.

847 **S3 Table.** List of yeast strains and plasmids used in this study

848 **S4 Table.** List of primers for Quantitative real time PCR (qPCR) used in this study

849 **S5 Table.** List of media condition used for solid fitness analysis for the haploid ncRNA deletion  
850 collection.

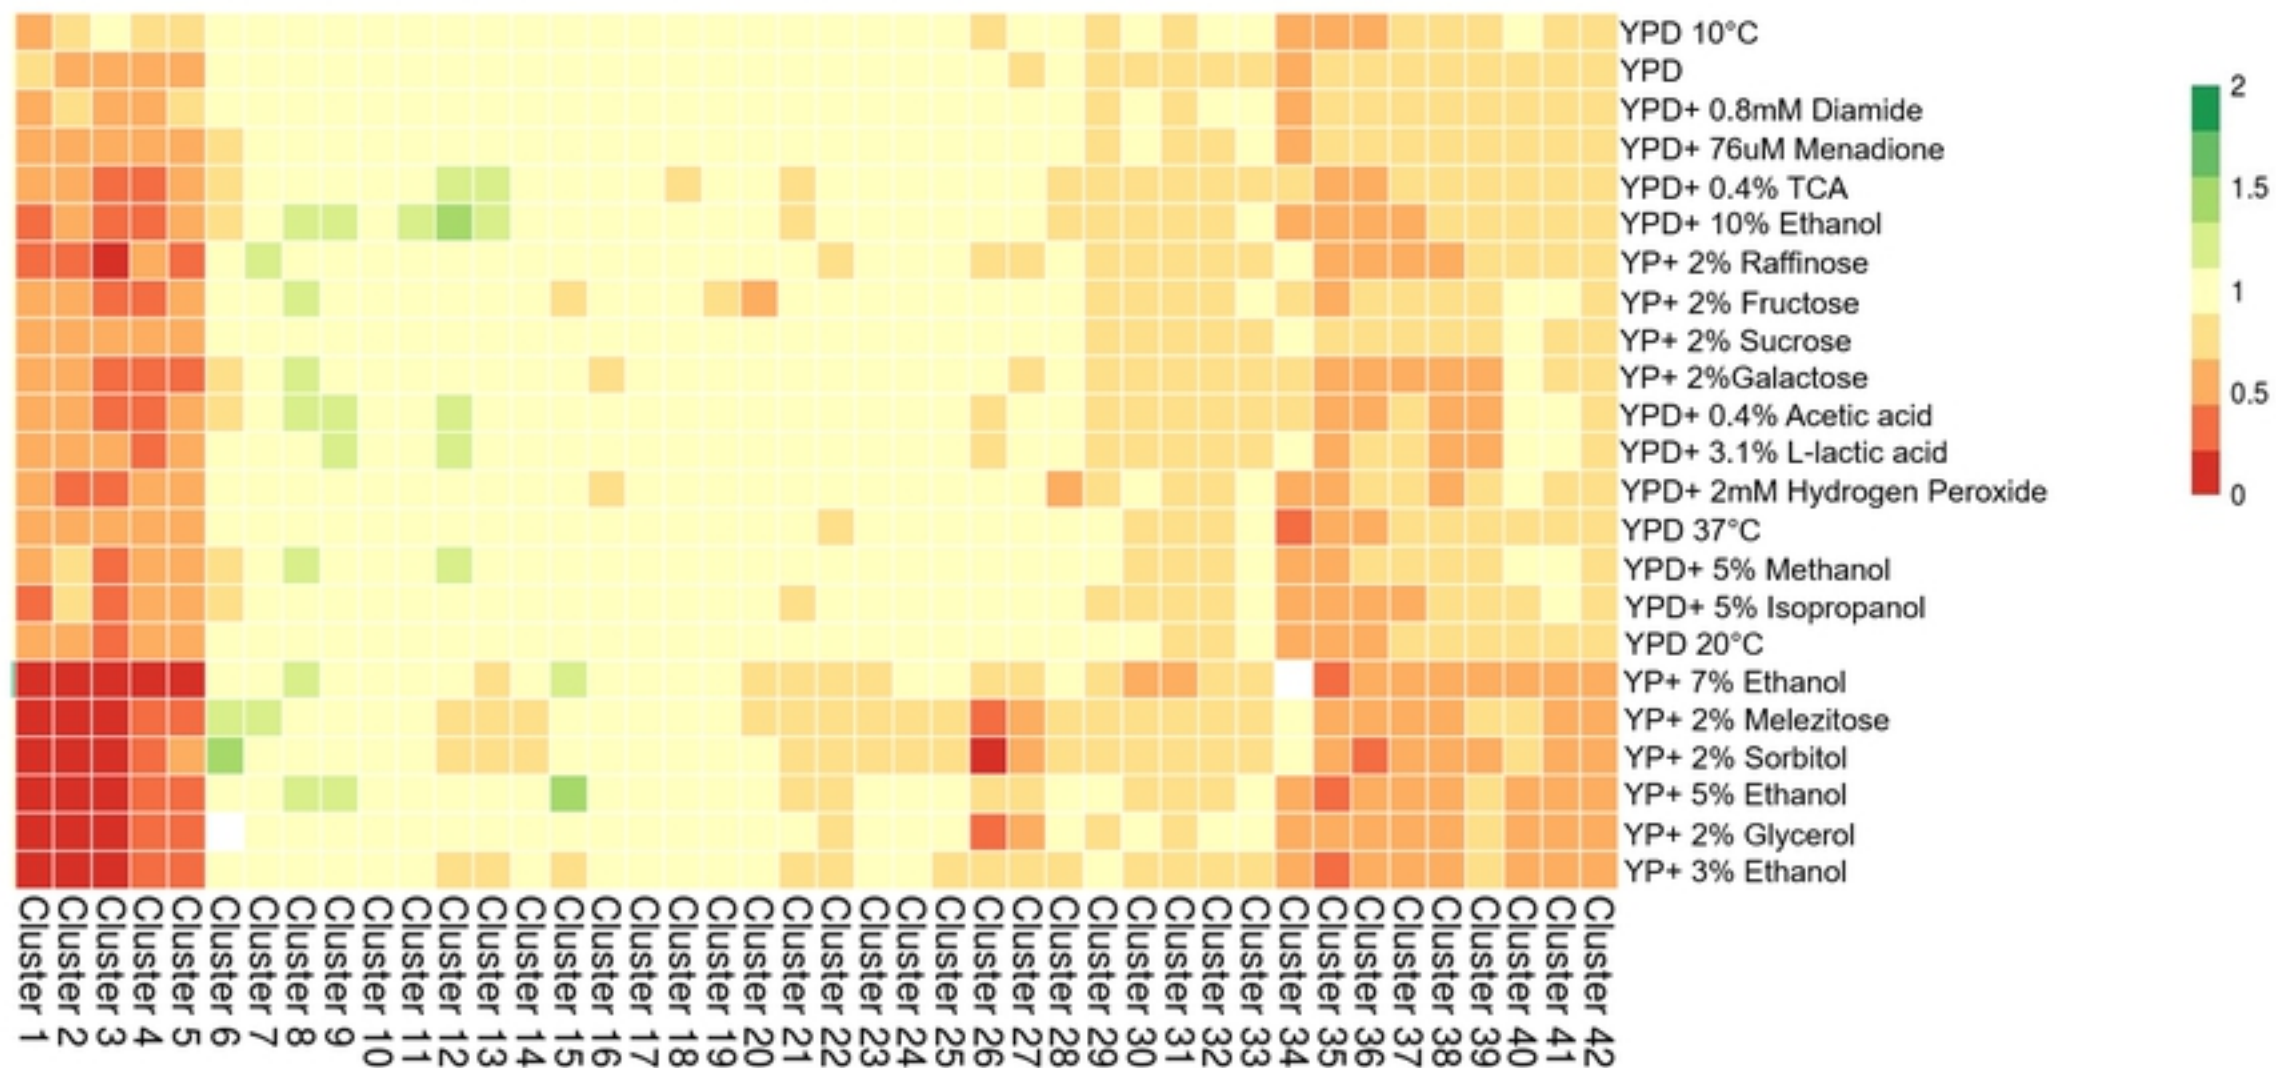

Figure 1

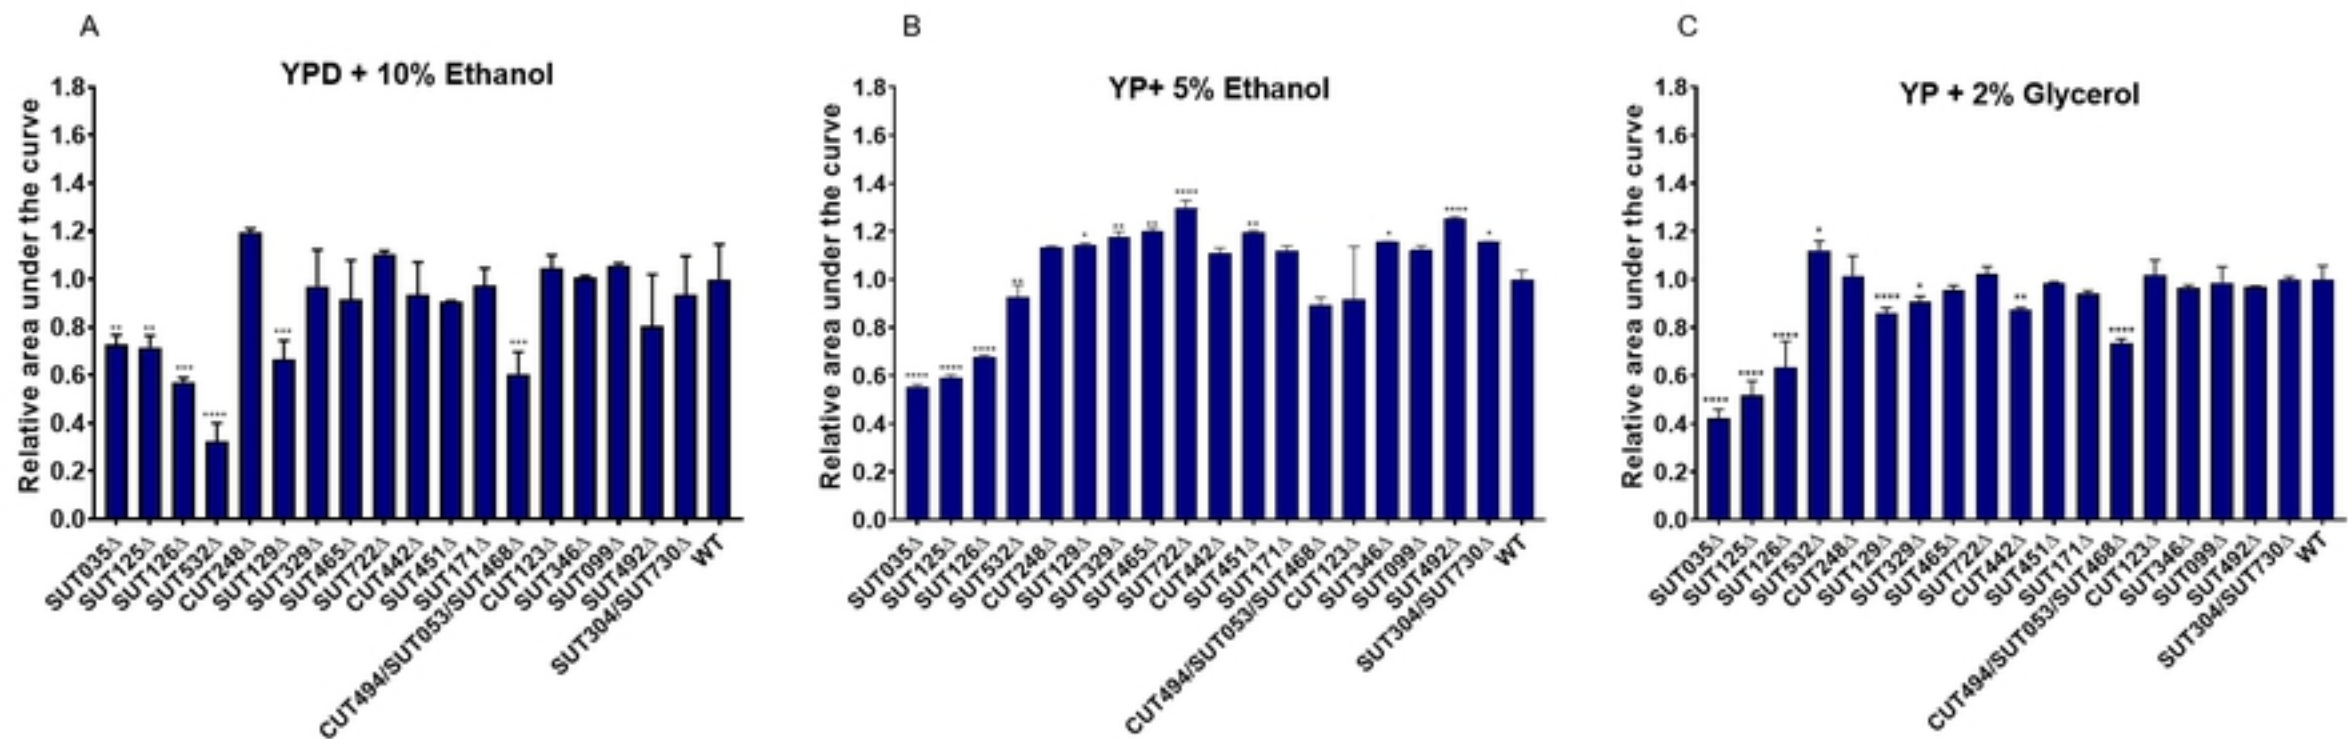

Figure 2

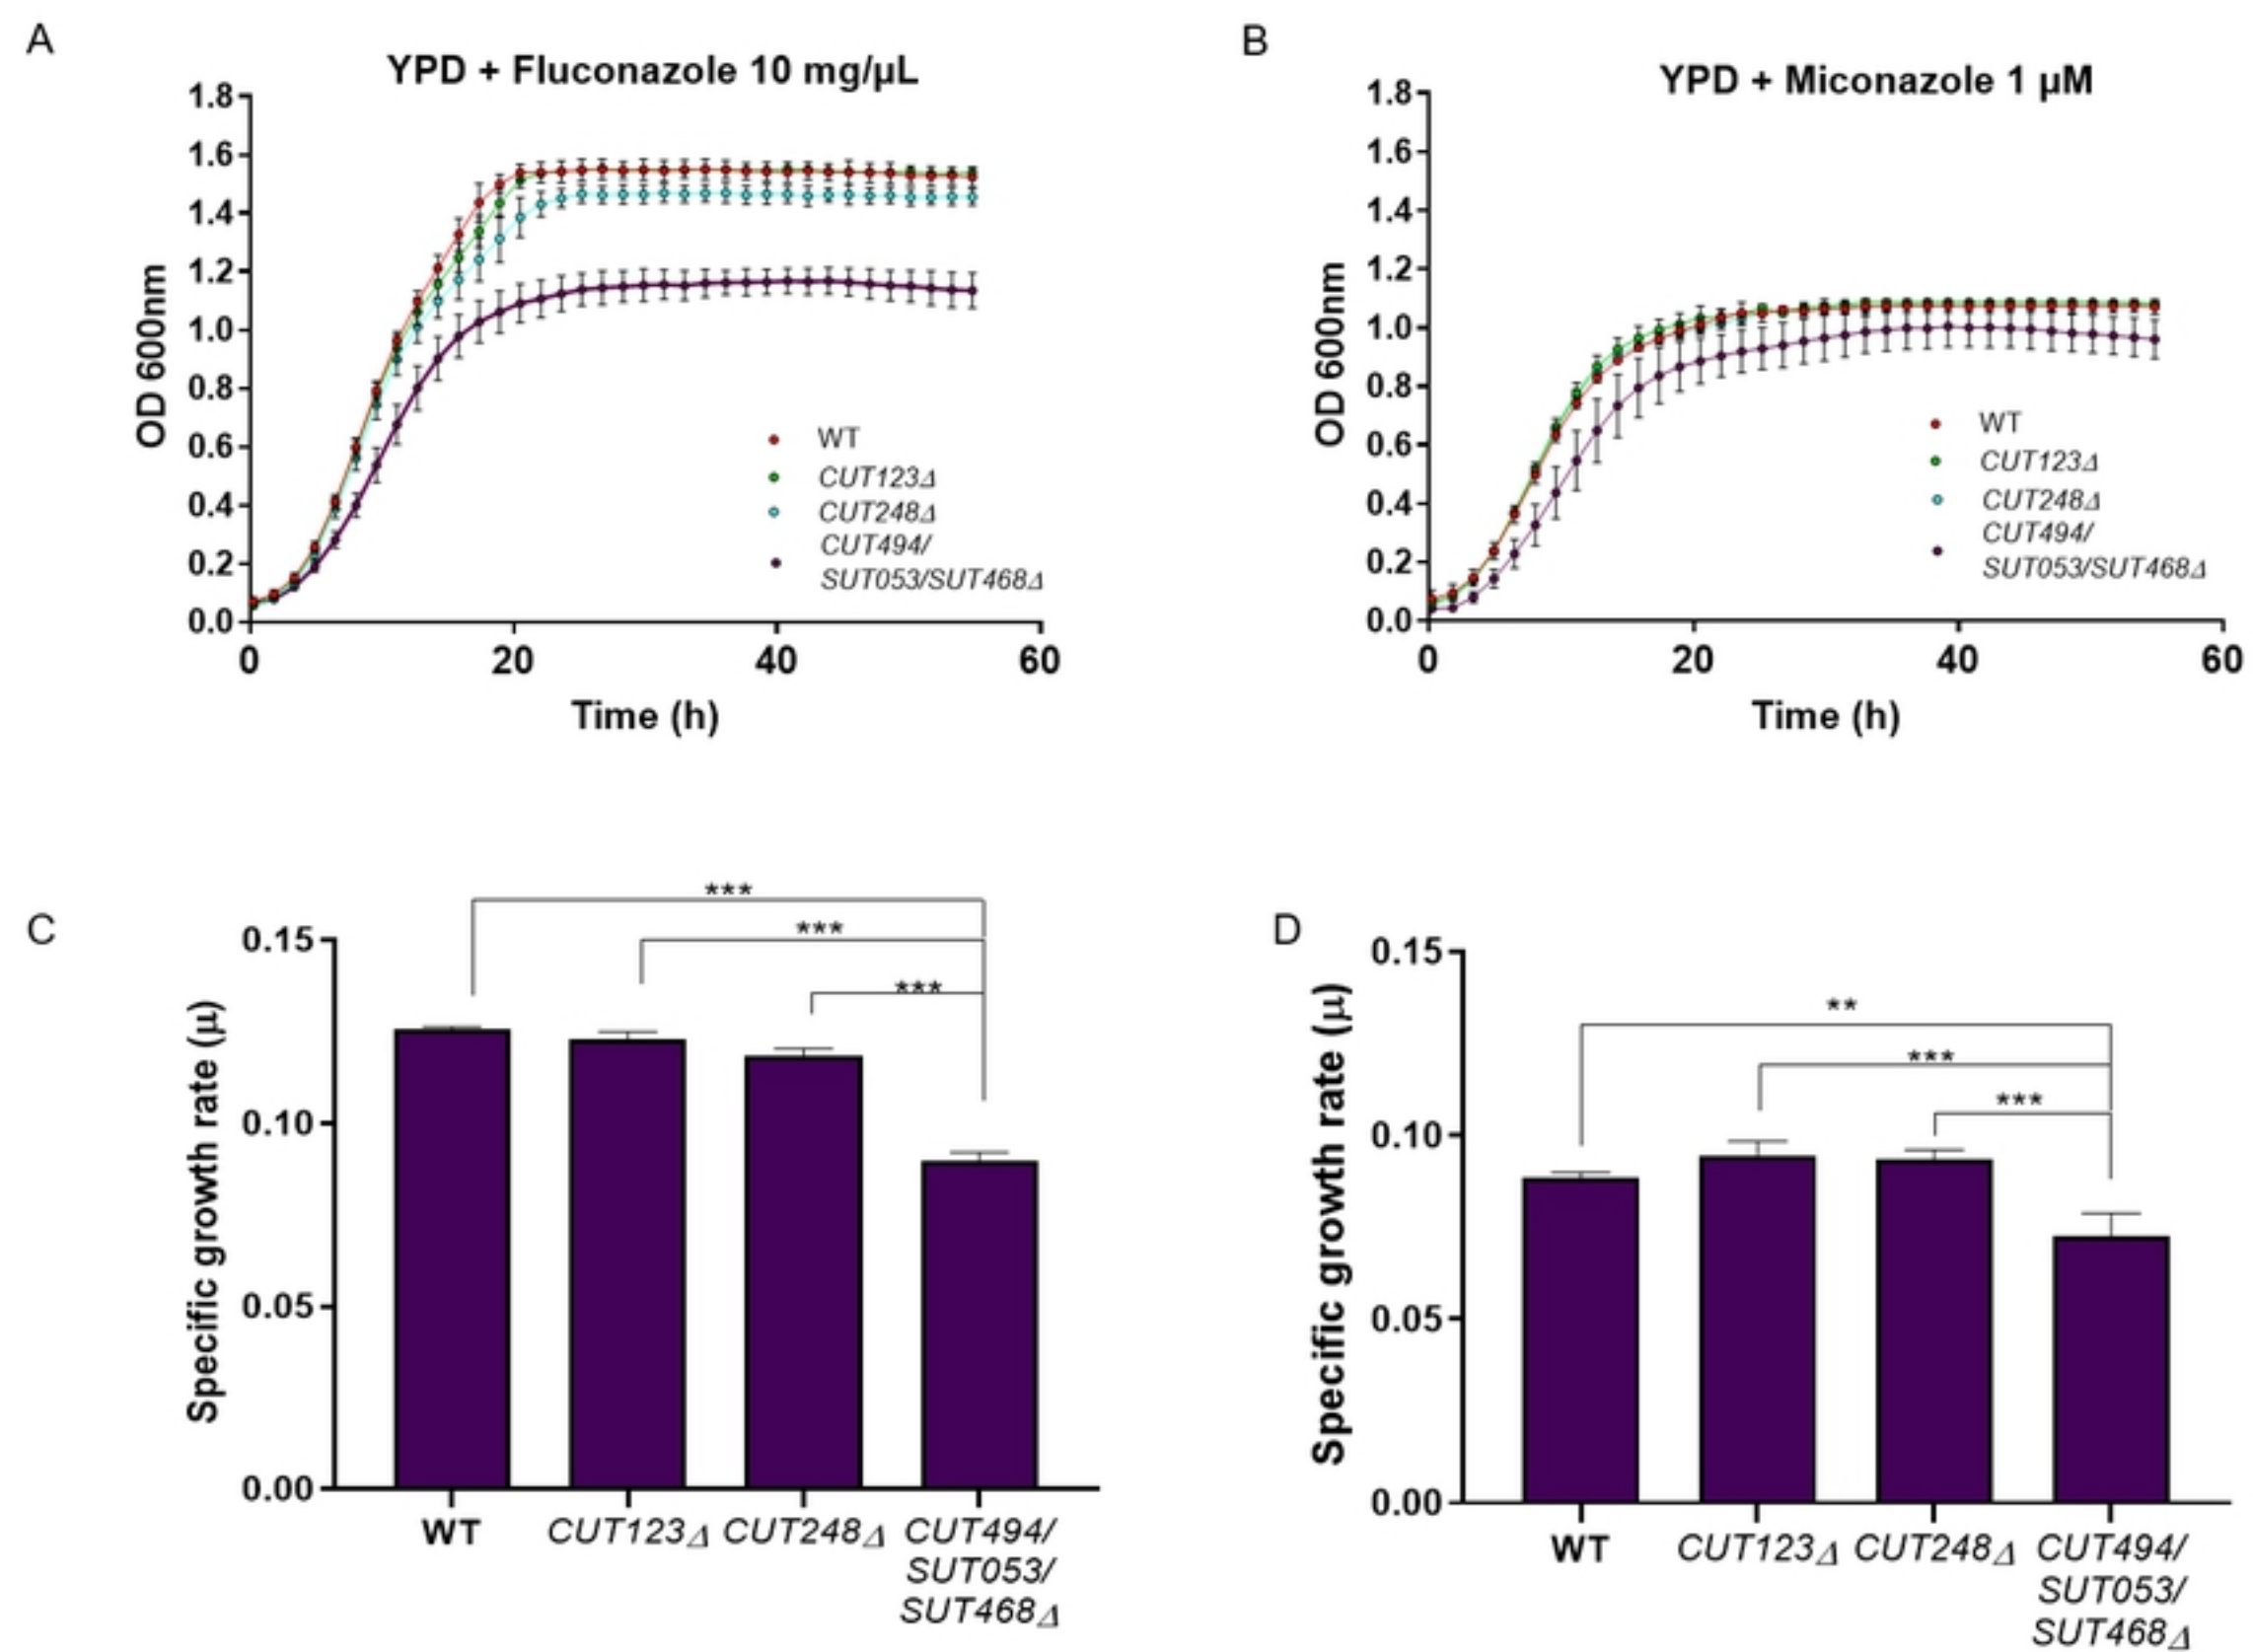

Figure 3

A

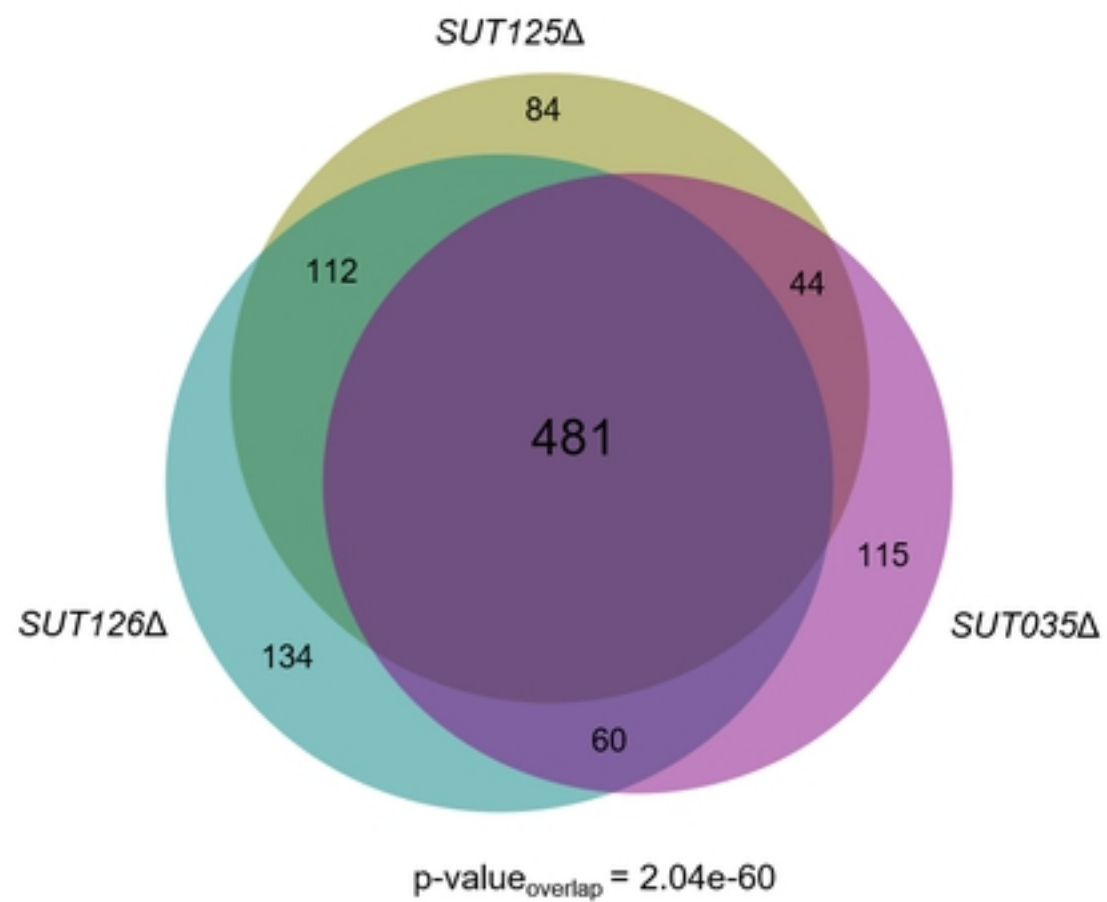

B

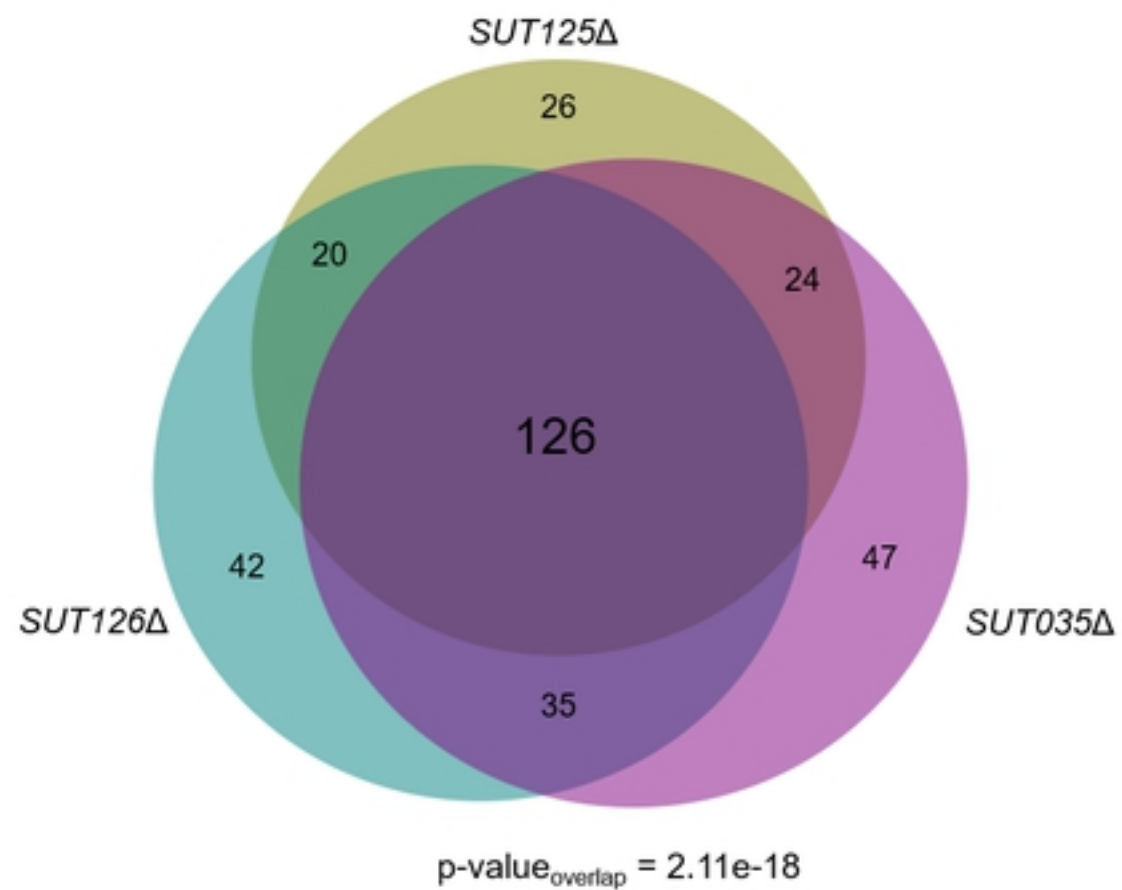

Figure 4



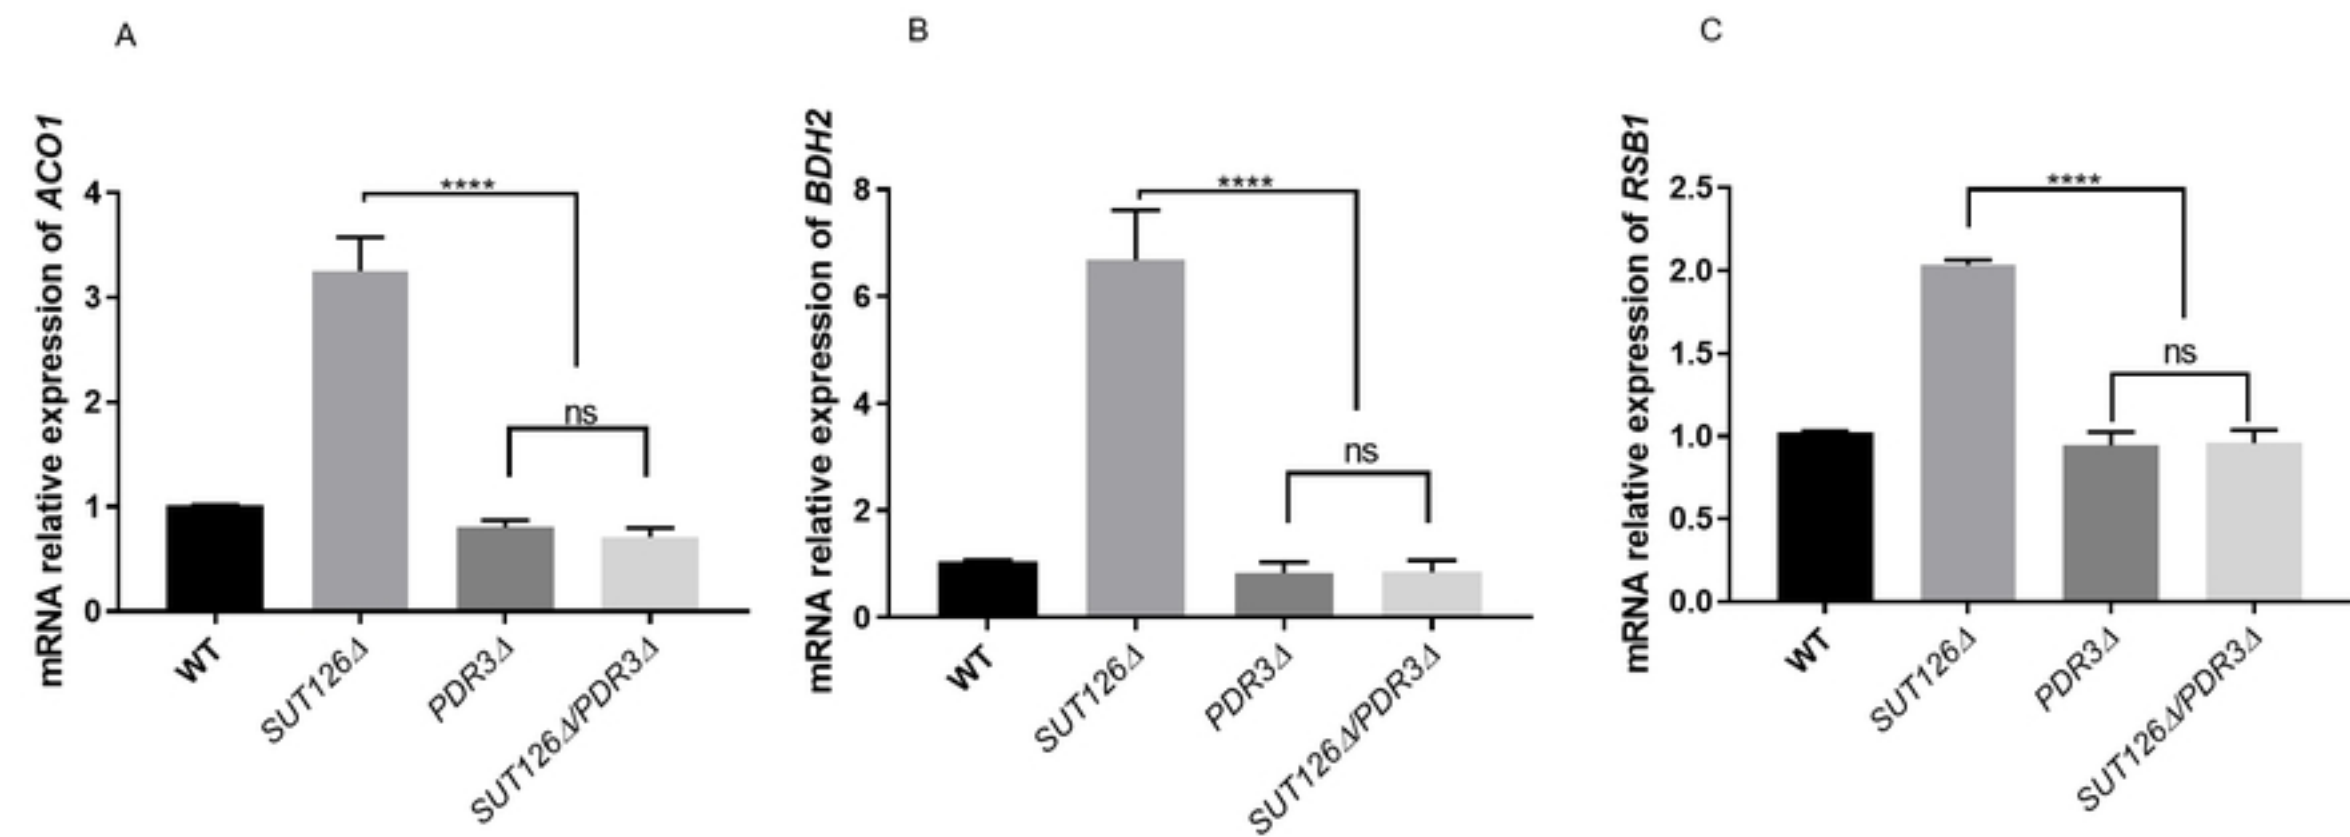

Figure 6

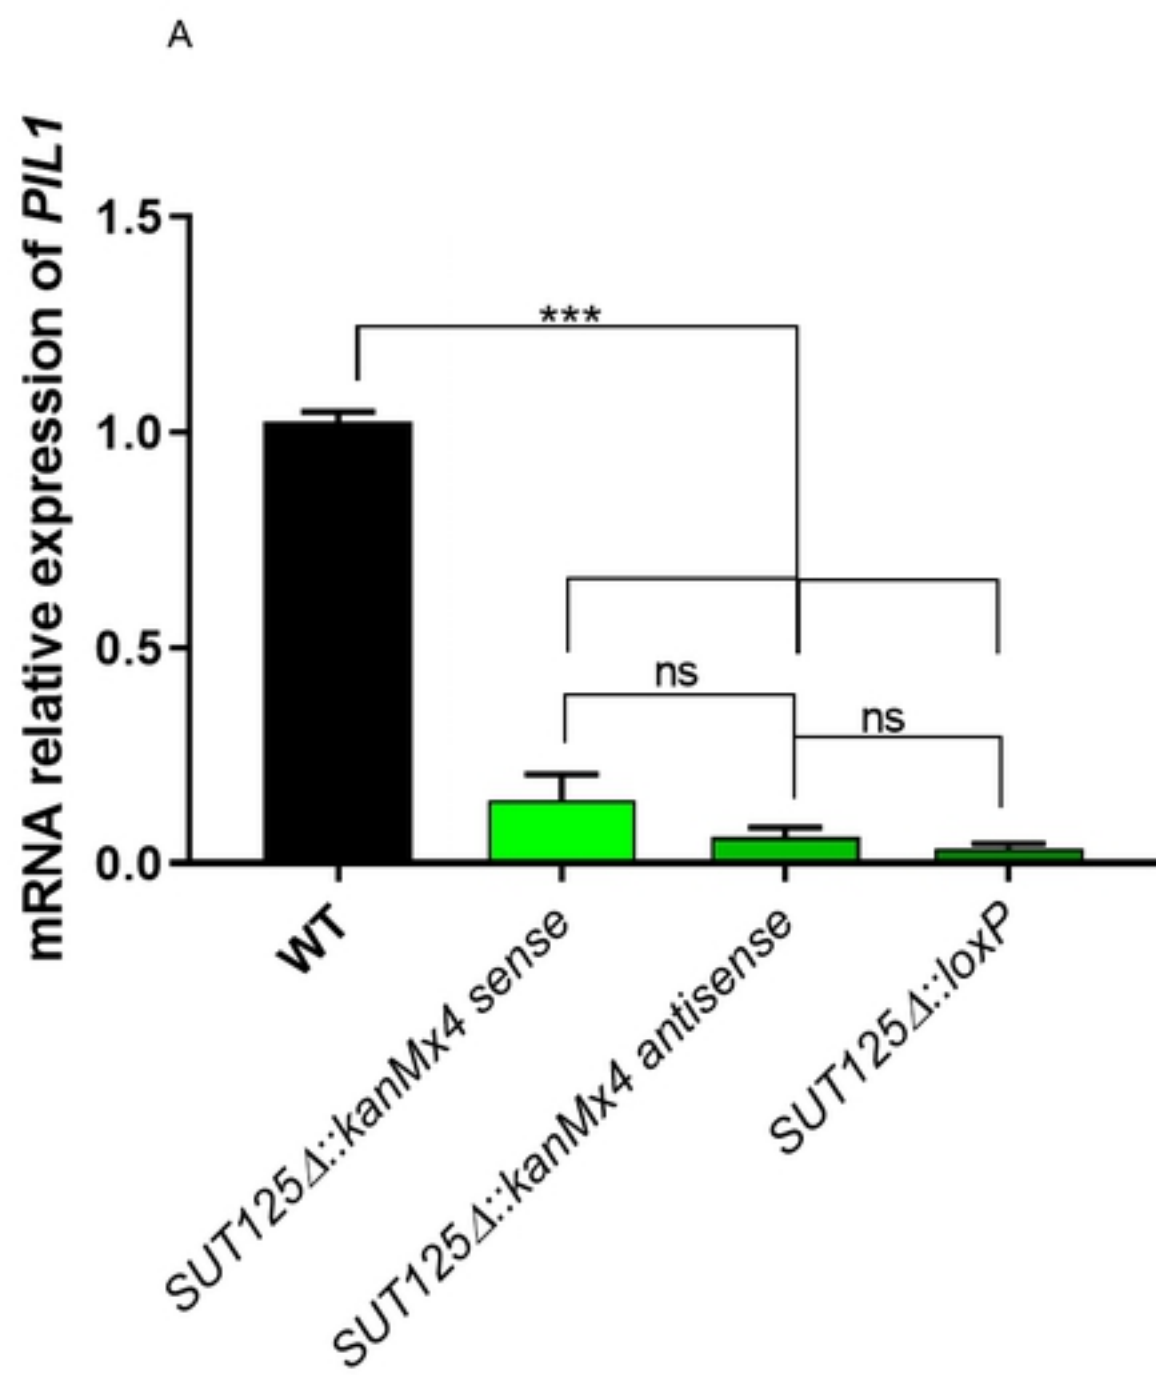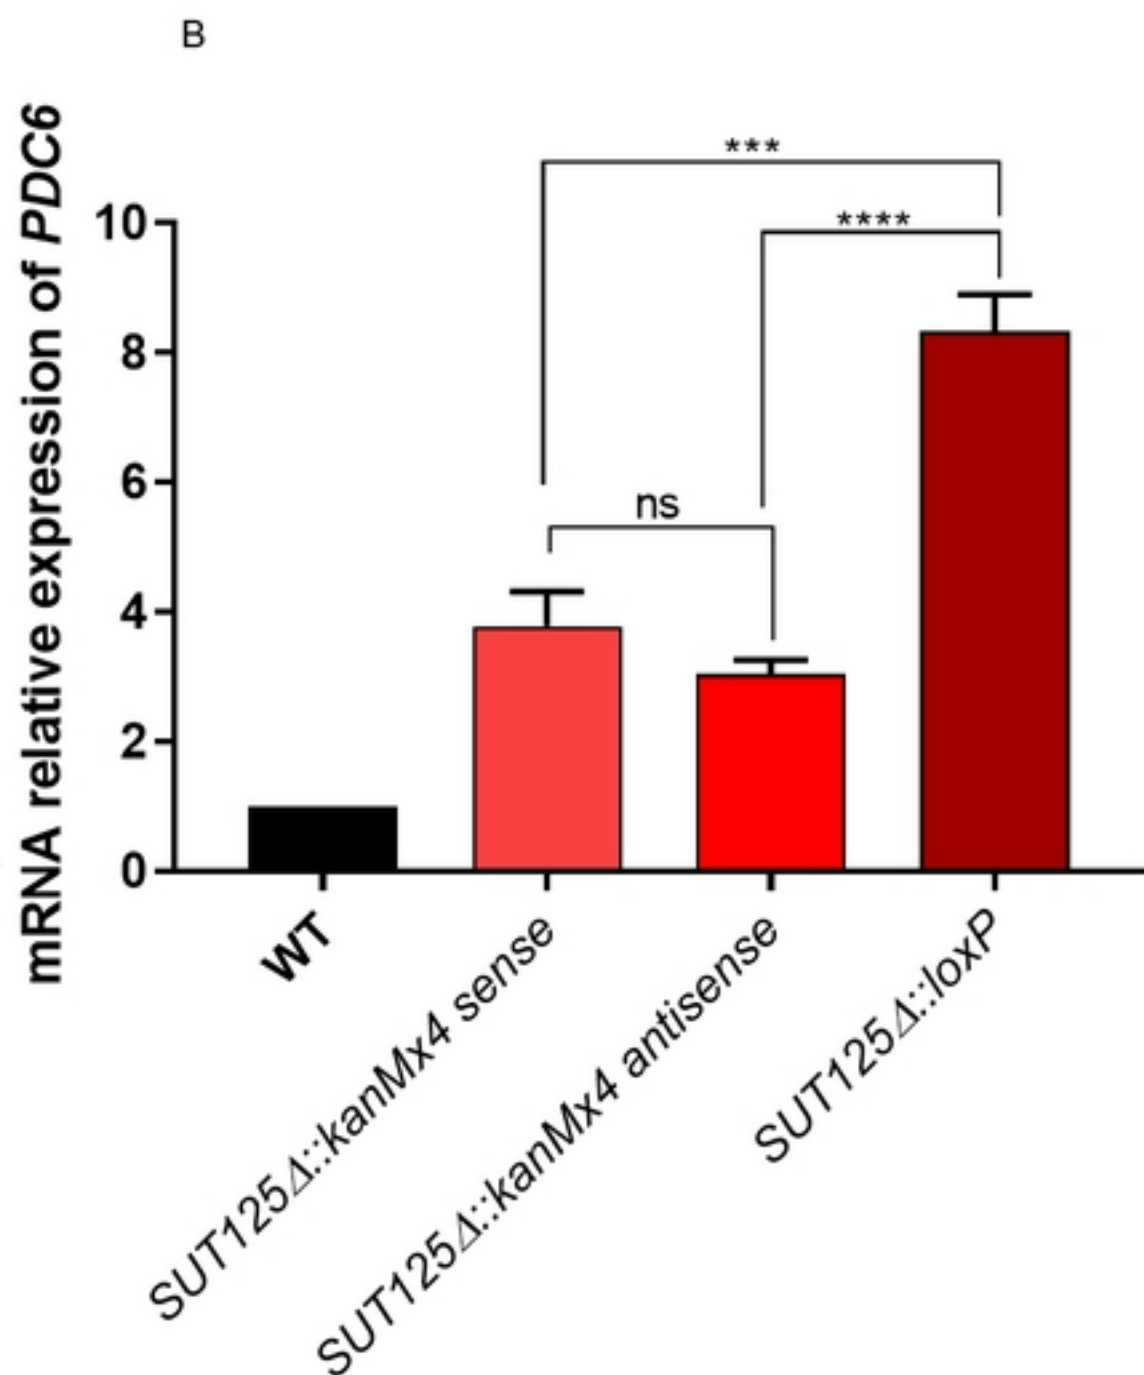

Figure 7



A

B

SD

SD + 5% Ethanol

Cells

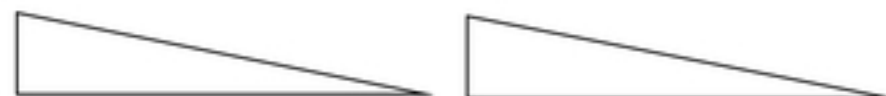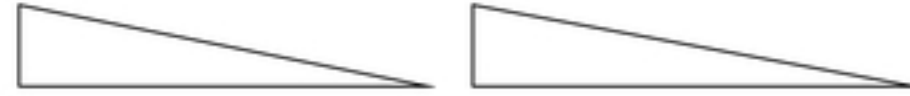

WT + pRS416Gal1Cyc1

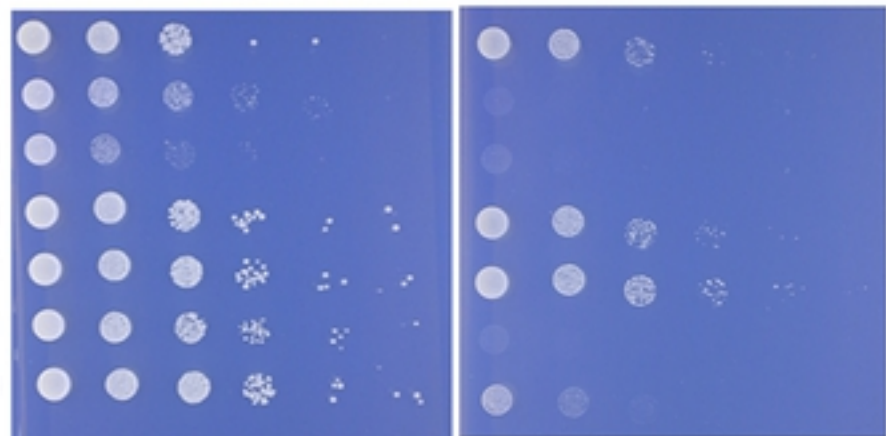

Glucose

Galactose

*SUT125Δ::kanMX* + pRS416Gal1Cyc1*SUT125Δ::loxP* + pRS416Gal1Cyc1*PIL1Δ* + pRS416Gal1Cyc1*PDC6Δ* + pRS416Gal1Cyc1WT + pRS416Gal1-*PDC6*-Cyc1*PIL1Δ* + pRS416Gal1-*PDC6*-Cyc1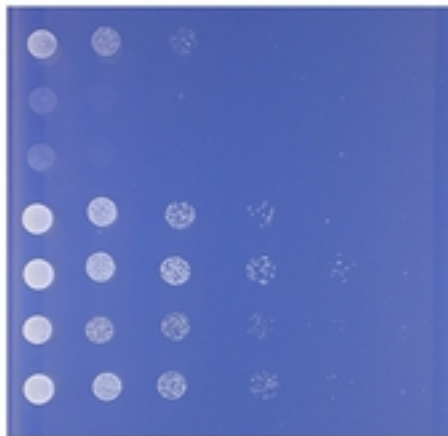

Glucose

Galactose

Figure 8

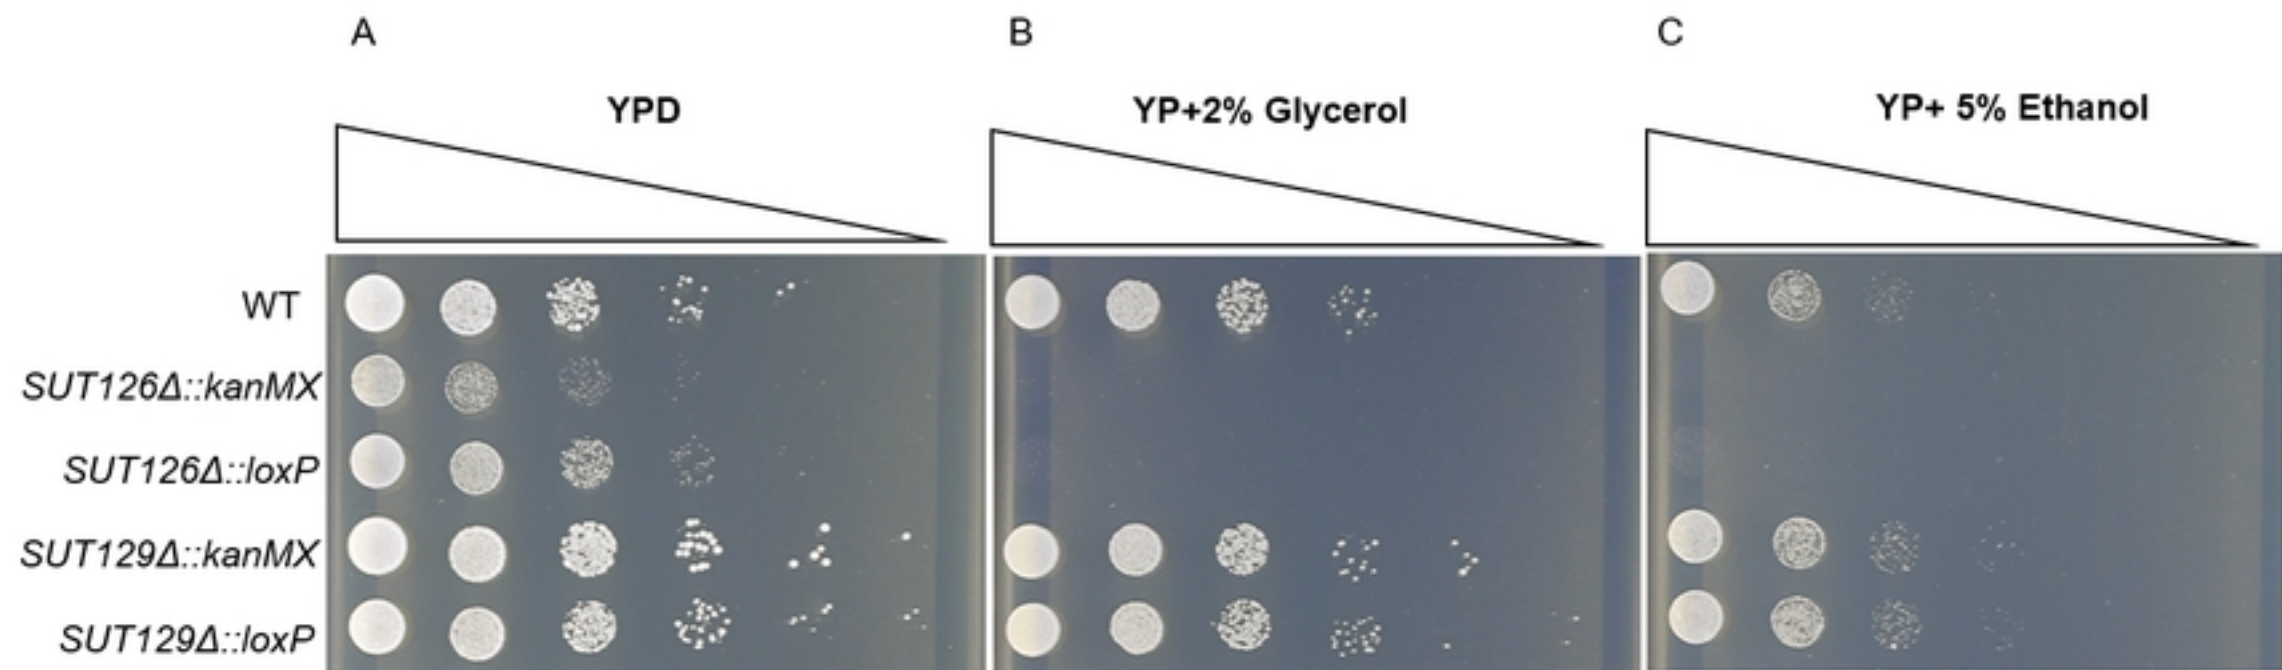

Figure 9

## SD-URA + Ethanol 5%

A

B

Cells

WT: BY4741 -

*SUT125Δ* +*SUT125Δ* -*SUT126Δ* +*SUT126Δ* -*SUT035Δ* +*SUT035Δ* -*SUT532Δ* +*SUT532Δ* -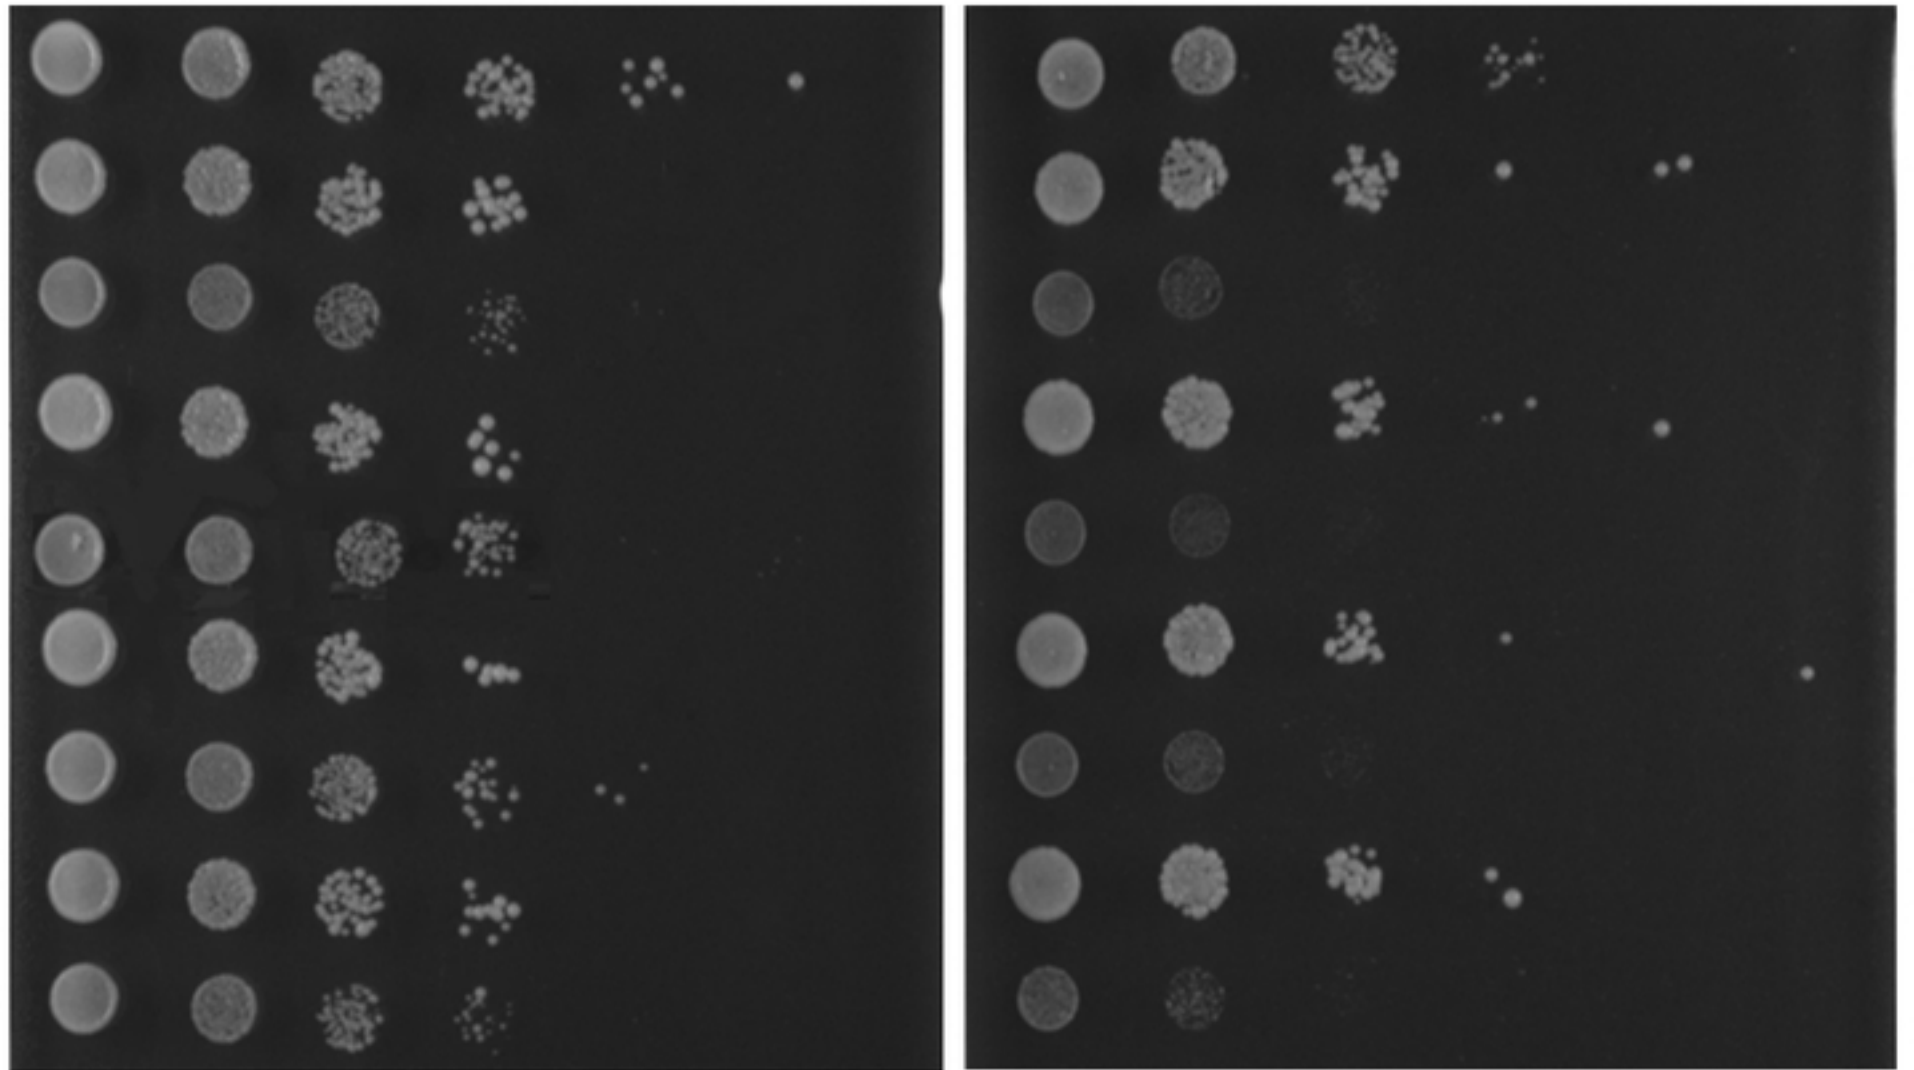

Figure 10
